# Supplementary material for: The associations between well-being and Cloninger’s personality dimensions in a Korean community sample
Source: PeerJ. 2024 Nov 12;12:e18379. doi: 10.7717/peerj.18379 (PMC11566513; doi:10.7717/peerj.18379)
Supplement: Data S2 [file peerj-12-18379-s002.xlsx]

## Sheet: Sheet1
ID	age	sex	i1	i2	i3	i4	i5	i6	i7	i8	i9	i10	i11	i12	i13	i14	i15	i16	i17	i18	i19	i20	i21	i22	i23	i24	i25	i26	i27	i28	i29	i30	i31	i32	i33	i34	i35	i36	i37	i38	i39	i40	i41	i42	i43	i44	i45	i46	i47
1	23	1	4	2	3	4	4	0	4	0	2	0	4	0	4	3	1	1	1	3	1	2	1	2	0	3	3	4	2	4	3	3	0	4	4	4	3	0	0	3	2	3	1	3	1	2	2	4	3
2	21	1	1	0	0	2	1	0	2	1	2	3	2	1	0	0	2	3	2	0	4	2	1	3	0	0	0	2	1	3	4	4	2	1	3	2	1	3	0	1	2	4	3	2	1	4	2	4	2
3	23	1	1	0	1	4	2	0	4	1	1	0	4	2	4	1	4	4	2	4	3	4	1	0	0	2	2	3	0	4	4	4	2	3	4	4	1	4	0	3	1	4	1	3	1	4	1	4	1
4	19	1	3	3	2	2	3	1	2	2	1	2	2	1	3	1	3	3	0	3	3	3	2	1	0	0	1	2	1	3	3	3	1	3	3	3	3	3	1	3	1	3	1	3	3	3	1	4	2
5	20	2	3	0	3	3	2	3	1	2	3	3	2	3	3	4	3	2	3	1	4	3	2	0	1	3	2	1	4	0	1	1	4	2	1	3	2	4	1	4	2	1	1	1	0	1	1	3	1
6	21	2	2	1	1	2	2	1	2	3	1	2	2	3	2	2	3	3	1	1	2	2	1	1	1	1	1	2	1	3	4	2	1	2	2	1	1	3	1	3	1	2	3	1	1	3	1	3	1
7	19	2	1	2	1	1	3	1	3	3	3	2	3	2	2	1	3	4	1	3	2	3	1	1	0	2	2	2	3	2	3	2	1	2	2	2	2	4	1	2	1	2	2	2	0	3	2	4	2
8	22	2	3	2	3	2	3	0	3	4	1	1	3	1	4	3	3	3	2	2	4	4	2	0	4	0	2	4	0	3	3	4	1	2	3	3	3	4	3	2	1	3	1	3	2	3	1	4	1
9	20	2	2	1	3	3	3	0	4	1	3	1	3	3	2	3	1	1	2	2	2	3	0	2	0	0	3	1	3	1	2	1	3	3	3	3	0	0	0	2	1	3	2	3	0	0	2	2	3
10	25	1	1	0	1	3	3	0	3	3	2	1	4	1	0	0	4	4	1	2	0	2	0	1	0	3	2	3	2	3	4	3	1	1	4	2	4	1	0	2	2	2	1	1	3	3	2	3	2
11	18	2	1	0	3	1	2	1	1	1	4	1	2	4	1	1	1	3	3	1	1	1	2	1	0	2	1	1	2	3	2	1	3	2	3	1	2	2	0	2	1	3	3	2	2	2	3	3	3
12	19	2	1	0	2	4	1	2	1	2	3	3	1	3	1	2	1	1	3	2	0	2	2	3	0	1	1	1	3	2	1	2	3	1	1	1	2	2	0	1	1	3	2	1	3	3	3	2	4
13	19	2	3	1	2	2	1	0	4	1	2	2	0	4	0	1	4	1	2	2	0	2	1	3	0	1	1	0	1	1	3	2	2	3	3	2	2	2	2	2	2	3	2	2	2	2	2	2	1
14	18	2	2	1	2	3	2	0	2	0	1	2	3	1	3	2	1	1	0	3	3	2	2	1	0	2	3	2	4	4	2	3	1	2	3	3	3	1	0	2	0	2	2	1	4	2	3	3	2
15	18	2	1	1	2	3	1	3	2	1	3	3	3	1	1	2	1	1	2	1	3	1	3	3	0	3	0	3	3	2	3	3	4	1	2	2	3	2	0	0	2	2	3	1	3	2	3	3	3
16	19	2	2	3	2	4	3	2	3	1	3	0	2	1	2	1	0	4	1	2	2	2	2	4	0	2	1	3	2	2	3	2	1	1	2	2	2	3	0	1	2	2	1	2	2	4	1	3	1
17	18	1	2	3	4	1	2	0	2	0	4	0	4	4	2	0	1	4	0	1	3	2	2	2	0	0	1	2	1	3	1	3	4	4	3	1	1	4	0	1	0	3	2	2	1	1	1	3	2
18	21	1	2	1	2	1	3	1	3	1	1	0	3	2	2	1	3	2	1	2	2	1	2	1	0	1	2	1	1	3	4	2	1	1	2	2	2	3	0	3	1	3	3	2	2	2	1	3	0
19	20	2	4	4	4	4	4	0	0	0	4	1	4	0	0	0	4	4	0	4	4	4	4	0	0	4	4	4	0	4	4	4	0	4	4	4	4	4	4	4	4	4	0	4	4	4	0	4	0
20	22	1	3	1	1	3	3	0	3	1	3	2	2	3	2	1	1	2	1	2	1	0	2	2	0	2	4	0	3	1	3	1	3	1	1	1	2	3	0	2	1	2	3	2	0	1	2	2	2
21	20	2	1	3	2	1	3	0	2	2	2	0	4	1	2	1	3	4	1	2	4	4	2	1	0	1	2	3	1	4	3	4	1	2	4	2	2	4	0	2	2	4	0	3	0	4	1	3	3
22	18	1	2	3	2	2	1	1	3	2	2	2	2	2	1	2	3	3	1	2	2	3	1	2	1	2	1	2	2	2	3	2	1	1	2	2	2	2	1	3	1	2	2	2	2	3	2	2	2
23	19	2	3	1	3	1	2	2	2	3	1	2	3	1	3	3	2	3	2	2	2	3	3	1	2	2	2	2	1	3	4	1	1	3	3	2	2	3	2	3	2	4	3	3	1	3	1	3	1
24	20	2	1	2	2	2	2	1	2	2	3	2	3	2	1	2	2	3	2	1	3	3	1	2	1	2	2	3	3	2	1	3	3	2	2	1	2	1	2	1	1	2	3	2	1	2	2	3	2
25	20	2	2	1	1	4	2	1	0	3	4	3	2	2	3	1	1	3	3	1	2	3	1	4	2	2	1	4	3	3	3	2	2	3	3	1	1	3	0	1	4	4	3	2	2	4	2	4	1
26	20	2	2	2	2	2	2	1	1	1	3	1	2	2	3	3	1	2	1	2	1	2	1	1	1	2	3	1	2	2	3	3	2	2	3	1	2	2	1	2	2	3	2	2	2	2	2	3	3
27	20	2	4	1	1	4	4	0	2	3	1	1	3	1	3	3	1	3	2	4	2	3	1	1	0	3	1	3	1	3	3	3	1	3	3	3	3	3	0	3	2	3	1	3	1	4	0	4	1
28	19	2	3	0	2	1	2	0	4	2	1	0	2	2	3	3	4	4	2	3	0	3	1	0	0	3	3	3	2	2	4	1	1	4	3	2	3	4	0	3	0	4	2	2	1	3	0	4	0
29	19	1	0	1	2	2	1	0	2	1	2	3	3	4	0	1	2	2	3	1	1	2	1	3	0	3	3	1	2	1	2	3	3	1	2	1	2	1	0	2	0	2	4	0	0	2	3	4	3
30	19	1	1	0	2	2	1	0	1	3	4	4	4	2	1	2	2	0	2	1	1	2	2	0	0	2	2	4	2	2	4	4	3	3	3	3	3	1	0	2	1	2	3	2	0	4	2	4	4
31	18	2	4	3	1	0	4	1	2	2	2	2	3	1	2	3	1	3	1	2	2	3	1	1	0	1	1	1	2	2	3	3	1	1	3	2	3	2	1	2	1	2	2	2	2	3	2	4	1
32	18	2	2	1	2	3	1	2	2	3	3	3	2	3	2	3	1	3	3	1	2	3	2	3	1	2	0	3	2	2	1	2	2	1	3	1	2	3	2	2	2	2	3	1	3	2	1	3	2
33	25	2	2	3	4	2	2	0	4	3	3	2	3	0	2	3	2	2	1	3	4	3	3	3	4	3	1	4	2	3	4	3	1	2	2	1	2	2	0	3	3	3	0	3	0	4	1	4	1
34	25	2	2	0	2	2	1	0	4	3	3	3	2	3	2	2	3	3	1	2	2	2	1	1	0	3	2	0	4	1	3	2	2	2	2	2	1	2	0	1	0	3	3	2	0	3	2	2	2
35	22	2	2	0	3	1	4	0	2	2	3	2	2	2	3	1	1	3	4	2	1	4	1	2	2	1	1	3	3	2	3	4	1	2	2	1	2	1	0	2	1	2	3	2	1	3	1	3	3
36	21	2	1	1	1	2	1	2	2	3	2	2	2	2	1	1	2	3	2	1	1	2	1	1	0	1	1	1	2	1	2	2	2	2	1	1	1	3	0	2	1	2	3	1	3	2	2	3	2
37	19	1	1	2	2	3	4	0	3	2	4	1	4	0	2	3	0	2	3	3	3	1	0	4	0	0	3	2	4	4	1	4	3	3	3	0	3	1	1	1	3	3	2	2	1	3	3	4	1
38	23	2	2	2	1	1	2	0	2	1	2	1	4	1	2	2	1	3	1	2	3	4	2	2	0	2	1	3	1	4	2	3	1	1	4	1	1	3	2	2	1	2	1	3	2	4	1	4	3
39	26	2	3	1	0	2	2	2	3	3	0	1	3	3	4	3	4	4	1	2	2	2	3	2	3	2	0	2	4	3	3	3	2	4	3	3	2	3	2	2	1	2	2	2	3	2	1	4	1
40	19	1	3	0	2	2	1	1	4	1	2	1	2	2	3	2	3	1	2	2	3	1	2	2	3	1	1	2	2	1	2	2	3	3	3	2	2	2	3	1	3	2	2	1	2	1	4	4	4
41	19	1	2	2	1	2	2	0	2	0	1	1	2	2	3	3	2	3	1	2	1	2	1	2	0	3	2	1	2	2	3	2	1	3	2	2	2	3	1	2	2	2	2	2	2	3	1	3	2
42	20	2	2	1	2	2	1	1	2	3	1	3	3	2	3	2	4	4	2	2	2	2	2	2	1	2	0	4	1	2	4	0	0	2	4	4	3	3	1	3	2	3	2	2	0	4	2	3	0
43	21	2	3	1	4	1	4	3	1	0	1	3	2	3	4	4	1	4	1	3	1	0	3	2	0	3	1	1	0	4	4	4	1	3	4	3	4	1	2	2	0	3	1	4	4	4	1	4	3
44	20	2	3	3	1	1	4	3	3	2	3	2	2	0	3	2	1	3	4	2	2	2	3	1	0	0	3	4	2	3	2	2	1	3	3	3	4	3	1	2	2	3	0	2	2	3	2	3	2
45	21	2	1	0	2	1	2	0	2	2	2	3	3	2	3	0	2	4	2	1	2	2	2	2	0	1	0	4	1	1	3	3	4	3	2	1	2	3	0	2	1	1	2	1	2	4	1	3	3
46	21	2	3	2	2	1	3	1	2	1	2	1	3	2	1	0	2	3	2	2	3	3	1	0	2	1	2	4	1	3	4	3	1	2	3	2	1	4	0	1	1	4	2	2	2	3	2	3	0
47	21	2	1	2	3	1	1	3	0	2	3	4	2	3	2	1	0	3	2	1	2	2	2	2	1	1	1	3	2	2	0	4	2	1	2	3	1	0	2	2	3	2	3	1	2	3	2	3	4
48	22	2	3	2	2	1	3	3	1	0	4	0	4	0	3	3	0	3	1	3	3	3	2	3	1	4	3	2	3	4	1	3	1	3	4	2	3	3	1	3	4	4	1	3	3	3	3	3	2
49	22	2	2	1	3	0	4	0	3	1	3	2	2	2	2	2	3	0	1	4	2	2	2	1	0	3	4	4	4	1	3	3	0	3	3	3	4	0	0	3	3	4	0	1	1	4	1	4	2
50	19	2	2	1	1	3	3	0	3	2	3	3	3	3	2	1	1	3	3	1	2	3	3	3	0	2	1	3	3	3	1	3	3	1	3	1	2	3	0	1	1	3	4	2	3	2	3	3	1
51	22	1	4	1	1	2	4	4	0	2	4	1	4	0	3	1	3	2	3	3	1	0	4	2	0	3	3	3	3	2	4	4	2	3	3	3	3	3	3	3	4	4	2	3	4	1	3	3	3
52	22	2	3	3	3	1	2	2	1	1	2	1	3	2	3	2	4	4	2	3	4	2	3	2	0	4	3	1	2	3	4	3	3	3	3	4	2	3	0	3	0	3	3	2	3	2	3	2	3
53	23	1	3	3	4	1	1	1	4	2	0	0	4	0	4	3	4	4	0	3	3	3	3	0	0	3	1	3	0	4	4	3	0	2	3	4	3	3	0	4	3	3	1	3	2	4	1	4	0
54	20	2	2	1	2	2	3	0	2	1	4	2	2	2	2	3	1	3	2	2	2	2	1	2	0	2	1	2	3	1	2	2	2	2	3	3	3	3	0	1	1	2	3	2	0	1	1	3	2
55	21	2	2	1	3	1	3	2	1	0	2	1	4	4	3	3	2	3	2	3	2	2	3	1	0	3	3	2	2	1	4	3	2	2	1	2	3	2	0	2	1	3	3	3	4	3	2	4	1
56	19	2	3	0	3	3	2	0	2	1	3	3	2	1	3	3	1	3	0	3	0	1	2	2	0	4	2	1	4	4	2	1	0	2	3	3	3	2	0	1	0	4	3	1	1	1	4	3	2
57	19	1	3	3	2	1	3	3	1	1	1	1	2	2	2	2	2	2	3	2	1	2	2	1	2	2	2	2	2	2	2	3	1	2	4	1	2	2	2	2	4	1	2	0	0	2	2	2	2
58	19	2	1	4	0	3	2	1	3	0	4	3	4	0	2	1	0	1	0	2	0	3	3	3	0	0	2	2	1	1	4	3	0	4	2	1	2	3	0	0	3	3	1	1	3	3	1	4	4
59	18	1	1	1	2	1	3	0	3	2	2	1	3	3	2	3	1	3	3	2	1	3	2	2	0	2	2	3	2	2	2	3	3	2	2	1	1	3	1	2	1	2	4	2	1	4	1	4	2
60	19	1	0	0	2	4	4	2	4	0	4	1	3	4	0	2	1	2	4	0	0	1	0	3	4	0	3	3	3	3	4	0	2	0	0	0	2	4	3	1	0	3	4	0	2	2	2	4	3
61	20	2	0	0	1	3	1	2	2	1	2	4	2	3	1	2	1	1	2	1	2	2	1	2	0	3	1	1	3	2	1	2	2	1	2	1	2	3	0	2	2	1	3	1	2	2	3	3	3
62	19	1	2	1	2	2	2	1	2	3	2	2	3	1	2	3	1	3	2	3	1	2	3	2	1	3	1	3	1	1	3	3	2	3	3	2	3	0	2	2	2	2	3	1	2	3	2	2	2
63	22	2	2	2	1	1	1	0	3	2	2	2	3	1	2	1	2	3	1	2	2	3	1	1	1	1	2	2	2	2	3	3	1	2	3	1	2	3	2	2	2	2	3	1	2	2	2	3	1
64	21	2	1	2	2	3	1	4	0	2	4	4	3	3	4	1	1	2	4	1	3	2	0	3	0	1	2	3	2	3	3	4	4	2	3	2	2	3	0	2	1	1	4	1	4	2	2	4	2
65	19	2	2	1	3	2	1	0	0	1	3	1	3	2	4	1	0	2	3	1	2	1	4	1	0	2	0	4	2	1	1	2	3	2	2	2	2	2	0	0	3	2	3	1	2	3	3	3	4
66	18	1	1	0	3	3	3	0	3	1	4	0	3	4	1	1	1	4	3	2	2	3	1	2	4	0	3	3	3	2	1	4	3	1	2	2	1	4	0	3	0	3	4	1	1	3	1	3	3
67	21	1	1	1	1	2	2	1	3	1	3	3	3	2	1	1	1	3	2	1	1	2	1	3	0	3	1	2	3	3	1	3	3	2	3	1	2	2	0	2	1	2	2	1	1	2	3	3	3
68	18	2	3	1	2	1	2	0	0	2	2	1	3	1	2	0	1	2	2	0	2	3	1	2	0	3	2	3	1	4	2	3	2	1	4	1	2	2	0	3	1	3	3	1	0	4	2	2	3
69	18	2	1	2	3	2	4	0	2	3	3	2	2	2	2	3	1	2	2	3	1	3	2	3	0	3	2	1	2	1	2	3	2	2	2	1	3	1	2	1	3	2	2	1	2	4	2	3	3
70	18	2	3	2	2	3	3	0	1	1	3	1	3	2	2	2	1	2	3	2	3	2	3	4	0	3	3	3	4	2	2	3	1	2	3	2	2	3	1	1	2	4	2	3	1	1	2	4	2
71	18	2	1	0	3	2	2	2	3	2	3	2	2	1	2	1	2	1	1	2	0	3	1	2	2	1	2	3	1	2	3	2	3	2	2	1	2	2	2	3	2	1	2	2	3	2	2	3	2
72	19	2	3	3	4	2	2	1	2	1	2	2	3	1	3	3	1	2	1	2	3	2	2	3	1	2	1	3	2	3	3	3	2	2	2	3	3	3	0	2	3	3	3	3	1	3	2	3	3
73	21	1	3	2	3	3	4	0	3	2	3	1	3	2	1	3	2	4	3	2	0	3	2	3	0	2	3	2	3	2	3	2	3	2	2	2	1	1	0	2	1	2	3	2	2	3	3	4	1
74	20	1	1	0	3	2	2	0	2	1	2	3	3	2	2	2	3	3	2	2	1	2	1	2	0	2	3	3	3	3	4	2	2	1	3	3	2	4	0	2	0	3	4	2	2	2	2	3	2
75	19	2	3	2	3	3	3	3	1	3	2	2	3	1	2	2	0	3	2	4	2	1	3	1	4	2	1	3	4	4	3	2	1	3	3	3	4	3	2	0	1	3	0	4	4	4	1	4	4
76	20	2	1	0	4	3	3	1	1	0	4	4	4	1	4	4	0	0	4	3	1	1	3	3	0	3	3	1	3	3	0	3	3	3	3	3	2	2	1	1	2	3	3	1	1	1	2	3	4
77	23	1	1	1	1	0	2	1	2	2	2	4	2	3	0	0	2	4	3	1	2	4	3	2	0	0	2	4	2	4	3	2	3	2	3	2	2	2	2	1	3	2	4	1	2	3	1	2	3
78	19	1	1	1	2	2	3	0	3	2	3	3	2	3	1	1	2	4	2	2	3	2	1	2	0	2	3	1	2	3	3	2	3	2	2	2	1	3	0	2	1	3	3	1	1	3	2	3	2
79	19	2	2	3	3	1	2	2	2	1	1	3	2	1	2	2	1	2	1	2	3	2	3	1	1	3	4	2	2	2	3	2	2	2	2	2	3	2	2	3	3	2	1	3	3	3	2	3	2
80	21	1	4	1	4	0	2	0	0	0	4	2	4	2	4	4	0	0	2	2	2	2	4	3	0	4	2	4	4	2	2	3	3	4	4	4	4	0	0	2	3	4	2	2	4	2	2	4	4
81	18	1	2	3	3	3	4	1	1	1	4	1	3	2	2	4	0	1	3	2	3	2	2	4	0	3	3	4	4	2	0	3	3	1	3	1	2	2	1	0	3	2	3	2	3	2	2	4	4
82	18	2	1	1	2	3	3	4	3	0	4	3	1	3	2	4	0	0	2	1	0	3	3	4	4	2	1	3	4	0	0	2	2	3	1	0	0	0	2	1	4	1	3	1	4	1	2	1	4
83	19	1	2	0	3	3	2	0	1	3	3	1	3	2	2	3	2	2	2	2	2	4	1	2	0	4	2	2	3	3	2	3	3	2	4	1	2	1	0	1	1	4	3	1	2	3	2	3	2
84	21	1	3	1	2	3	3	1	2	2	2	1	2	2	2	2	2	3	2	2	2	3	1	2	0	2	3	2	2	2	3	2	2	2	4	2	2	2	0	2	1	2	3	2	3	3	2	2	1
85	21	1	2	0	1	2	2	0	3	4	2	1	3	3	2	0	2	3	2	2	1	3	2	1	0	2	3	3	2	4	3	3	2	2	4	3	2	3	0	2	0	4	2	3	0	4	1	3	0
86	22	1	1	1	1	2	1	0	2	2	2	4	1	3	1	1	2	3	2	1	1	3	1	2	0	0	2	2	1	3	4	3	1	3	3	2	2	2	0	3	0	2	3	1	1	3	2	2	3
87	19	2	2	1	4	1	2	1	2	1	4	3	2	3	2	3	1	3	2	1	2	2	1	2	0	3	2	3	4	1	2	3	3	1	2	1	2	3	0	1	2	2	3	2	2	3	2	2	2
88	23	1	1	1	1	1	2	0	0	4	4	3	2	3	3	3	0	3	3	2	1	4	3	4	0	2	2	4	4	2	1	2	3	3	2	2	2	0	0	1	3	3	3	2	0	0	2	2	4
89	22	1	2	3	2	0	4	2	3	3	0	1	4	1	3	3	3	4	1	3	4	3	1	0	0	2	2	2	0	4	4	3	1	2	3	4	3	3	2	3	3	4	2	2	0	4	0	4	1
90	21	1	2	1	2	2	3	0	2	2	1	3	2	2	2	1	2	4	1	2	2	3	1	1	1	1	1	2	2	3	4	1	1	1	4	1	2	3	1	3	1	3	2	2	2	3	2	4	1
91	21	1	3	1	1	2	3	0	4	3	1	0	2	1	2	2	3	4	0	2	2	3	2	2	0	0	1	3	0	3	4	2	0	2	3	4	4	3	0	3	1	1	0	2	0	4	2	4	0
92	19	2	1	2	1	1	0	4	1	0	2	2	2	1	1	3	1	4	2	1	0	1	3	2	0	3	1	1	1	2	3	2	0	2	2	2	1	4	0	3	0	2	3	2	3	2	3	4	2
93	22	2	2	2	2	2	4	1	3	2	3	2	3	2	3	3	0	3	2	3	3	3	3	2	0	3	3	1	1	2	0	3	1	2	2	1	2	3	0	2	2	2	2	1	2	3	1	4	3
94	23	2	1	2	1	2	1	2	2	2	2	1	2	3	2	2	2	3	2	2	2	3	2	1	0	2	2	2	2	1	3	2	2	1	2	2	2	3	0	2	1	2	3	1	1	3	2	2	1
95	22	1	1	3	1	2	3	0	3	3	2	1	4	1	3	2	1	3	2	2	3	4	0	2	0	0	0	3	2	1	3	3	1	1	1	3	4	3	0	2	2	3	1	2	1	4	2	4	1
96	22	1	3	0	2	3	3	0	1	1	1	1	2	4	2	3	2	3	2	2	0	2	2	1	0	1	2	1	2	2	3	1	2	2	2	2	3	1	0	2	0	2	4	2	0	2	1	2	2
97	22	1	1	2	2	3	2	0	3	1	2	1	2	2	1	1	2	3	1	2	2	2	1	1	0	0	1	1	1	2	3	3	2	2	2	2	2	3	1	1	0	3	3	1	0	1	3	3	1
98	22	1	4	3	2	2	3	3	3	3	3	2	3	0	4	3	2	4	0	3	2	2	1	3	4	4	4	4	4	4	4	0	0	0	0	0	0	3	3	2	3	2	1	2	1	1	2	2	3
99	23	1	2	1	2	2	3	2	0	1	2	3	1	3	2	3	0	2	3	3	4	2	3	3	2	3	2	2	2	2	1	3	2	1	3	4	3	3	2	2	2	1	3	1	3	2	2	2	2
100	21	1	1	3	2	2	1	2	0	3	3	1	2	3	2	3	0	3	2	1	4	3	1	3	0	2	2	4	2	2	0	4	1	1	2	1	1	4	0	1	3	1	3	1	4	3	2	4	2
101	22	2	1	1	2	1	0	0	2	2	3	2	4	4	1	3	1	3	4	1	3	2	1	2	0	4	3	4	2	3	2	3	4	1	4	2	3	2	1	2	0	2	4	2	2	3	3	4	4
102	22	2	2	2	2	2	3	3	2	3	3	2	3	2	3	3	1	2	2	3	1	1	3	2	3	2	2	3	2	2	1	2	1	2	3	2	3	2	3	2	2	2	3	2	3	1	2	3	2
103	20	2	1	3	2	4	3	1	4	0	3	1	3	4	2	3	4	4	4	3	2	2	2	3	0	2	3	4	4	0	4	4	4	1	2	4	2	2	4	2	0	4	4	3	0	4	4	4	2
104	23	1	2	2	4	3	3	1	2	2	2	3	3	2	3	3	1	3	2	3	3	2	1	1	0	2	3	2	2	1	2	3	2	3	2	2	2	2	0	3	2	3	2	2	4	2	1	4	4
105	20	1	1	3	4	1	4	2	3	0	2	1	4	2	1	2	0	3	2	3	2	2	1	4	1	1	3	2	2	2	0	4	2	1	3	2	3	2	0	1	2	1	2	1	2	2	2	3	2
106	23	1	1	2	3	3	2	2	3	1	4	3	3	2	2	4	0	0	2	2	2	3	2	3	0	2	2	3	3	3	1	3	2	3	3	2	3	2	3	1	3	3	2	2	2	3	2	3	3
107	22	1	1	2	2	1	2	0	4	3	1	1	3	1	1	3	3	4	0	2	3	3	1	0	0	2	1	2	0	3	3	3	0	2	3	2	3	3	2	4	2	2	1	2	2	4	1	3	0
108	18	2	1	1	1	1	2	1	1	2	3	3	2	3	1	1	1	2	2	2	1	2	2	2	3	2	2	2	3	2	2	2	2	2	2	1	1	3	1	1	1	3	2	2	3	2	2	3	3
109	19	2	2	1	2	2	1	1	3	2	1	1	2	2	2	3	2	3	2	2	1	2	1	2	0	3	2	3	2	2	2	2	3	2	2	2	2	2	0	2	1	2	3	2	2	2	1	2	1
110	18	2	3	1	2	1	2	2	1	1	1	1	3	2	2	1	1	4	1	2	3	3	2	3	0	3	1	2	1	2	3	2	1	2	3	2	3	2	0	2	1	2	2	2	3	3	2	3	2
111	18	2	2	2	1	3	2	0	3	2	2	1	3	1	3	0	2	3	0	2	3	4	1	2	0	2	1	2	3	2	3	2	0	2	2	3	3	3	0	4	0	2	2	1	2	2	1	3	2
112	21	1	2	1	0	0	0	0	4	3	0	4	4	2	2	0	3	4	0	2	2	4	0	0	0	2	0	4	0	4	4	4	0	4	4	4	4	4	0	4	3	4	3	4	2	4	2	4	0
113	22	1	1	1	1	2	2	1	1	1	3	3	2	2	1	3	0	2	2	1	0	1	1	2	0	2	1	3	2	3	1	3	1	1	3	1	1	1	1	2	1	1	3	1	1	3	2	2	3
114	19	1	3	2	2	2	2	2	2	2	1	1	2	2	2	2	1	2	1	2	2	2	1	2	0	0	2	2	2	3	4	3	0	2	2	3	3	4	0	3	2	3	2	3	2	3	1	3	1
115	27	2	4	2	1	3	2	3	3	3	3	0	3	2	3	1	2	4	4	1	3	4	3	3	0	4	1	4	4	2	3	3	2	3	3	1	2	3	1	2	3	3	3	3	1	3	1	3	1
116	28	1	2	1	1	2	3	3	1	3	2	1	3	1	2	3	0	2	2	3	1	2	2	2	0	2	2	4	2	2	1	4	2	2	2	2	3	3	0	2	3	3	2	2	3	3	2	4	3
117	25	2	1	2	1	2	2	1	2	1	2	2	2	2	2	1	2	4	3	1	2	2	1	2	0	1	1	3	3	1	2	2	2	1	2	2	2	3	0	1	1	3	3	2	2	2	2	4	3
118	24	2	3	3	0	0	1	4	3	1	0	1	4	1	4	0	4	4	0	2	1	1	2	0	0	2	0	1	0	3	4	3	0	3	3	3	1	3	0	3	2	3	1	2	3	2	1	4	2
119	27	1	1	3	3	4	3	2	2	0	4	2	3	2	1	1	0	3	3	2	3	4	1	4	1	1	2	3	3	2	0	4	2	1	2	2	2	2	2	0	3	2	2	2	2	3	3	4	2
120	25	1	4	3	2	3	4	0	3	1	3	0	4	0	4	1	1	2	0	4	4	3	3	0	0	4	4	4	2	4	4	4	0	3	2	3	3	4	0	2	3	4	0	4	2	4	1	3	1
121	23	1	2	1	1	2	1	2	2	1	2	3	2	2	2	1	2	4	2	1	2	3	1	2	0	2	1	1	2	2	2	1	1	2	2	1	1	2	0	3	1	2	3	1	2	3	2	3	3
122	19	1	4	2	3	3	4	0	3	2	1	0	3	1	1	0	3	3	0	3	2	3	1	0	0	0	2	3	1	2	3	3	2	2	3	3	3	2	0	3	1	4	3	3	0	3	1	4	0
123	20	2	2	2	2	4	2	1	2	1	2	2	3	2	3	2	2	2	2	2	2	2	2	2	2	2	3	2	2	2	2	3	2	2	2	2	2	2	2	2	2	2	2	2	2	2	2	2	3
124	20	2	1	2	0	3	1	0	0	0	3	3	2	3	1	0	2	4	1	1	2	3	3	3	0	3	1	2	3	4	3	2	1	0	3	1	2	0	0	1	1	3	3	1	3	2	2	4	3
125	20	2	3	4	4	3	2	0	1	0	4	3	3	0	3	3	0	3	3	2	4	0	2	2	0	2	2	2	3	4	1	3	1	2	3	2	2	3	2	1	3	4	1	2	3	4	3	4	4
126	20	1	2	1	3	3	1	3	0	2	1	1	3	1	2	1	1	3	1	0	2	3	2	3	0	1	0	1	1	3	1	2	1	1	2	0	0	3	0	3	2	2	2	2	3	1	2	3	3
127	21	2	1	2	2	3	3	0	3	2	4	4	3	2	2	3	1	2	4	2	2	3	1	3	1	1	2	3	3	3	2	4	4	2	3	3	1	3	0	0	0	4	2	2	0	2	2	3	4
128	18	1	3	3	2	0	4	0	3	3	0	1	3	1	2	1	4	4	0	3	2	4	1	0	0	2	3	2	0	4	4	2	0	2	3	3	3	4	0	4	3	4	1	4	2	4	0	4	0
129	18	2	1	1	3	2	2	0	2	1	3	3	2	4	1	1	2	3	3	1	1	2	1	3	0	1	2	1	2	2	3	2	3	2	2	2	1	3	1	2	0	3	3	2	2	2	3	4	3
130	19	2	0	1	2	2	2	0	2	2	1	2	2	4	1	0	2	3	4	1	3	3	0	1	3	2	2	1	2	1	2	2	3	1	2	1	1	3	1	1	1	3	4	0	1	3	3	2	2
131	19	2	3	1	3	1	4	0	1	1	2	3	3	1	2	3	1	2	1	3	3	1	2	3	3	3	1	1	3	3	1	2	1	1	3	3	2	2	0	1	2	3	1	3	2	1	3	3	3
132	18	1	1	0	4	4	2	0	2	3	4	4	1	4	0	3	0	2	4	0	1	0	1	4	1	1	1	2	4	2	0	2	4	2	3	0	0	0	1	0	3	0	4	0	0	1	2	1	4
133	21	1	3	2	2	1	2	0	4	3	0	2	3	1	2	2	4	4	0	2	2	3	1	0	1	1	2	2	0	3	4	2	0	2	2	3	3	4	2	2	2	2	3	2	1	3	0	4	0
134	21	2	1	2	1	3	3	0	2	2	3	3	3	3	1	1	1	1	1	2	2	1	2	3	0	0	2	3	3	3	1	3	3	1	3	2	2	3	0	2	1	3	3	2	0	1	2	3	3
135	19	1	3	3	1	1	3	2	1	1	1	2	3	1	2	2	1	3	3	2	4	0	1	1	0	2	4	3	3	3	3	3	1	2	3	1	1	4	0	1	3	1	2	1	3	2	1	3	2
136	20	2	3	2	0	2	3	3	1	1	2	0	4	3	2	1	2	2	3	3	2	4	1	2	0	3	3	4	2	4	2	4	1	2	3	1	3	4	0	2	0	3	1	2	4	4	3	3	0
137	21	2	3	3	4	3	3	0	0	1	3	1	4	3	1	1	1	3	1	3	4	2	0	0	0	3	3	3	1	0	3	3	2	0	4	2	3	4	0	1	3	4	3	3	0	4	4	4	1
138	23	1	2	1	3	2	3	0	1	1	4	2	3	3	3	2	0	3	3	4	3	1	1	2	4	2	2	4	3	3	1	3	4	1	3	2	2	3	2	1	1	3	2	1	2	2	3	3	4
139	22	1	3	3	1	1	2	0	1	0	1	2	2	2	3	2	1	3	1	2	2	1	3	1	0	4	2	2	1	3	2	3	2	4	2	2	3	3	1	2	1	2	1	2	1	2	2	4	2
140	18	2	3	1	3	1	4	1	3	1	1	1	3	1	3	0	3	3	1	3	2	3	1	0	2	1	3	3	1	3	4	3	1	2	2	2	4	3	1	3	2	3	1	2	2	2	1	3	1
141	22	1	2	3	3	3	1	1	2	1	3	3	3	2	1	0	1	4	0	1	3	3	2	3	0	1	1	2	3	2	3	3	1	2	3	1	1	4	0	1	3	2	3	1	2	2	3	4	3
142	23	1	0	0	2	1	1	0	3	1	1	1	2	4	2	0	3	3	2	1	3	4	2	0	0	2	0	4	0	2	4	4	2	2	2	1	1	3	0	2	2	2	4	1	4	4	2	4	0
143	20	2	2	3	1	2	3	3	1	2	2	0	2	2	3	1	1	3	3	2	3	3	2	2	1	2	2	3	2	3	1	3	2	1	2	1	1	3	2	1	2	3	3	2	2	3	2	3	2
144	20	2	2	2	0	1	1	0	3	3	1	1	3	1	2	0	4	4	0	2	2	4	2	0	0	1	1	2	0	1	4	2	0	2	2	2	2	3	0	4	2	2	2	2	1	3	2	2	0
145	20	2	1	0	0	2	3	4	4	2	3	3	2	3	1	0	4	4	3	2	1	3	2	0	0	2	1	3	1	3	4	2	3	1	1	1	1	0	0	2	1	3	3	1	4	2	2	3	3
146	23	1	2	1	1	1	2	0	1	2	3	2	3	1	3	2	2	2	2	2	3	3	3	2	1	2	3	3	2	2	3	2	1	2	2	2	2	2	0	2	3	2	2	1	2	2	3	3	2
147	19	1	3	2	2	1	3	1	3	3	3	1	4	1	3	1	2	3	2	3	4	3	3	1	0	4	1	4	2	3	3	3	1	3	3	2	3	4	1	2	3	3	1	2	3	3	1	4	1
148	21	1	3	1	1	1	3	3	1	3	1	1	3	1	3	1	1	3	2	2	1	3	1	1	0	0	3	2	1	1	4	3	0	2	3	3	1	1	2	3	3	3	1	3	3	3	1	3	1
149	20	2	3	2	2	4	3	0	3	2	3	3	4	1	2	1	3	4	1	2	2	4	1	1	4	0	2	4	1	4	3	4	0	2	4	3	2	3	4	2	2	3	1	3	2	3	1	4	2
150	18	1	2	1	1	2	3	0	3	2	3	2	2	0	3	2	3	2	2	3	2	3	2	2	3	2	1	2	2	3	3	3	2	1	3	1	2	2	3	3	2	2	2	3	2	3	3	2	1
151	19	2	3	2	1	2	3	0	3	2	3	1	3	0	3	0	2	1	0	3	2	3	3	2	3	2	2	2	3	1	3	3	0	2	2	3	3	1	1	2	2	0	0	4	4	1	3	2	2
152	19	1	0	0	0	3	2	3	4	0	0	0	3	4	3	0	4	4	4	4	0	1	3	0	0	4	0	4	3	4	4	4	3	4	0	3	4	1	0	4	3	3	4	0	4	4	0	4	0
153	18	2	3	1	1	3	2	0	1	1	4	3	3	2	2	1	1	3	2	3	3	3	1	4	0	2	1	3	3	1	3	3	2	3	3	2	2	1	2	2	3	4	2	2	0	3	2	3	3
154	19	1	1	1	1	1	3	0	4	1	0	1	4	3	1	1	3	4	1	1	2	3	2	0	0	1	1	2	0	2	4	2	1	2	1	1	1	3	0	3	1	2	3	2	1	2	2	4	1
155	19	1	1	0	2	1	1	0	1	3	3	3	2	3	1	2	3	3	2	2	1	1	1	2	0	2	1	1	2	3	3	1	2	1	3	2	2	2	0	2	1	2	3	1	1	3	2	4	2
156	25	1	1	1	1	2	1	0	2	2	2	1	3	2	2	1	2	3	1	2	3	3	1	1	0	0	1	3	1	2	3	3	1	2	2	2	2	3	1	3	2	3	2	2	1	3	2	3	2
157	25	2	1	2	2	2	3	3	0	1	4	1	2	1	4	4	0	1	2	3	1	2	2	4	0	2	3	3	3	1	1	2	1	3	1	1	2	0	0	0	2	2	3	1	2	3	1	2	4
158	18	2	2	1	3	1	3	1	2	1	2	2	3	2	1	1	1	3	1	2	2	2	1	2	1	1	1	3	2	2	2	3	2	2	2	1	2	2	1	3	2	2	3	2	1	2	2	3	3
159	19	2	1	1	1	2	4	0	3	1	4	2	3	1	2	2	1	3	2	2	1	3	1	1	0	2	4	3	2	3	3	4	2	2	3	2	2	2	0	3	2	4	3	2	1	4	1	1	3
160	22	1	2	3	2	1	1	0	1	2	2	1	3	0	2	0	1	4	0	2	3	4	3	1	1	0	1	2	1	2	3	3	0	2	2	2	1	4	0	1	3	3	1	3	2	0	1	3	3
161	18	2	2	3	1	2	3	1	3	4	1	1	4	0	3	0	2	3	0	3	4	4	4	0	0	4	2	4	0	2	4	4	0	3	3	3	3	1	0	4	4	3	0	2	3	4	3	4	0
162	18	2	0	3	2	3	3	0	4	0	0	3	3	0	1	1	1	4	0	0	4	4	4	0	0	4	3	1	4	3	4	3	0	3	3	1	1	4	0	1	4	3	1	3	4	4	2	4	3
163	18	2	2	0	2	2	2	0	4	1	2	2	3	1	2	1	3	3	1	1	3	3	3	2	0	2	2	3	3	2	4	1	1	3	3	2	3	3	0	1	2	3	2	2	1	3	2	4	1
164	18	1	1	3	1	3	3	3	1	1	3	3	1	1	3	1	1	4	0	1	3	3	1	2	0	0	0	4	4	4	1	3	1	1	4	2	1	2	0	2	4	0	1	1	4	3	2	3	2
165	18	2	3	2	3	3	4	1	3	1	1	0	4	0	3	2	4	3	1	3	2	4	2	2	0	2	4	2	2	3	4	4	1	2	3	3	4	3	1	2	1	3	1	3	2	3	2	4	1
166	18	2	1	1	0	2	2	0	1	1	3	1	3	2	3	2	2	2	1	1	3	2	1	2	0	3	2	3	2	1	3	3	1	2	3	1	2	2	0	3	2	1	2	1	1	4	2	4	2
167	20	1	3	3	2	2	3	2	2	1	2	1	4	0	4	3	1	2	3	3	3	1	3	2	1	2	1	3	3	3	3	3	1	3	3	3	3	3	1	2	3	3	1	3	3	3	2	4	2
168	20	1	3	1	1	2	3	0	1	1	0	1	3	2	3	4	2	4	0	2	2	4	0	0	0	2	1	1	0	0	4	3	0	2	1	1	3	4	0	4	1	3	1	3	3	4	0	3	0
169	22	1	1	1	2	3	3	0	2	2	2	1	2	3	1	2	1	3	2	3	1	2	2	1	1	3	2	2	1	1	4	2	2	1	3	2	2	1	1	3	1	3	3	2	2	2	2	3	2
170	22	2	1	2	2	2	3	1	2	1	3	3	3	1	2	3	1	1	1	2	3	2	1	2	3	1	1	1	2	3	1	3	1	2	3	3	2	2	1	2	3	4	3	3	2	3	3	3	2
171	22	2	1	2	1	4	1	0	1	2	4	2	3	2	2	0	0	3	1	1	1	2	2	4	1	3	1	1	4	3	2	3	1	1	3	0	1	3	1	1	1	1	2	1	0	4	2	3	2
172	19	1	2	0	1	2	2	2	2	1	0	4	2	2	3	3	1	2	1	3	2	2	4	0	0	4	0	2	0	2	4	4	0	3	2	4	4	0	0	2	4	4	3	2	2	4	1	3	4
173	19	2	2	0	1	1	2	0	2	1	0	2	3	2	2	1	2	2	1	3	0	2	1	0	2	0	0	2	0	2	3	2	1	1	2	1	1	3	0	3	0	2	3	1	1	3	1	3	1
174	24	1	1	0	2	3	2	1	2	2	2	2	3	1	2	2	1	2	1	2	1	3	1	2	2	2	4	4	2	3	4	3	2	2	2	1	2	1	0	2	2	3	3	0	1	4	2	4	2
175	21	1	2	1	2	3	1	0	1	0	4	2	1	2	0	0	0	4	3	1	4	1	1	3	0	4	0	0	3	4	4	1	1	0	1	2	3	4	0	1	3	4	3	2	0	4	3	4	0
176	21	2	1	1	3	4	4	0	2	3	4	2	2	3	3	2	1	2	1	3	1	3	3	3	0	2	2	4	3	2	1	3	3	2	2	3	3	2	1	1	2	3	3	1	1	3	2	3	1
177	18	2	1	3	3	1	2	3	2	3	1	1	4	0	2	1	3	3	1	1	2	3	1	0	0	3	2	4	2	3	3	3	1	2	4	2	1	2	0	4	4	2	3	2	3	4	1	4	1
178	18	1	0	0	1	2	1	1	2	2	2	4	1	1	2	2	2	2	0	1	1	3	1	1	0	3	2	2	2	1	3	1	1	1	2	1	1	2	0	3	2	3	2	0	2	3	2	2	2
179	25	1	1	0	2	1	1	1	3	2	1	2	3	1	2	1	3	3	0	1	2	3	2	0	0	1	2	4	1	3	3	1	0	2	1	1	2	3	1	2	3	2	1	1	3	3	3	2	1
180	24	2	2	1	1	3	2	3	1	2	3	1	3	2	1	2	1	4	2	1	3	3	2	2	1	3	2	1	2	2	2	3	2	2	3	1	2	2	1	2	1	2	3	2	1	3	3	3	1
181	27	1	4	1	1	4	4	0	0	0	4	0	4	0	4	1	0	4	0	0	1	4	0	2	0	2	4	4	1	4	0	4	0	1	4	2	1	4	0	2	4	4	0	4	0	4	0	4	0
182	24	2	2	1	2	1	2	0	1	1	3	3	3	1	3	1	0	3	0	1	1	3	1	2	0	0	1	0	1	2	2	1	0	1	3	1	1	2	0	1	2	1	1	2	1	3	2	3	3
183	19	1	1	1	1	2	2	0	1	2	2	2	2	1	1	0	3	1	2	2	2	2	2	1	0	1	1	3	2	1	3	3	2	2	2	2	3	2	0	2	2	2	3	1	1	3	2	3	2
184	19	2	0	2	2	2	2	0	2	1	4	1	3	3	0	1	1	3	3	1	3	2	1	4	0	2	4	1	3	1	2	3	3	1	2	2	1	2	0	1	1	2	3	1	4	1	4	3	3
185	20	2	0	0	2	3	3	0	2	2	2	3	2	2	1	0	1	1	3	2	1	3	1	3	2	3	2	2	2	2	3	1	1	1	2	1	2	3	1	2	1	2	3	1	2	3	2	3	3
186	20	2	2	1	0	1	4	0	2	0	3	1	4	0	0	1	1	4	0	2	1	3	2	2	0	1	1	3	2	4	3	3	0	3	3	4	3	4	0	3	1	4	0	3	2	4	1	3	0
187	20	2	1	0	1	2	2	0	3	3	1	3	1	3	1	1	2	3	1	1	1	2	1	3	1	1	1	2	3	2	3	3	1	2	1	0	1	2	0	2	3	1	2	1	2	3	2	2	1
188	22	2	2	2	3	3	3	3	2	2	3	3	3	0	4	2	1	3	1	2	2	3	1	1	2	2	1	3	2	2	3	3	0	2	2	2	2	3	2	2	2	3	1	3	2	3	1	4	4
189	19	2	2	2	2	2	2	3	1	2	3	3	3	1	3	2	1	1	1	2	2	3	3	2	1	3	2	3	2	2	2	3	1	3	2	2	3	1	2	1	2	3	2	2	3	2	2	3	3
190	21	2	4	2	2	2	3	4	2	2	3	3	3	1	3	3	1	2	1	2	2	2	2	2	2	2	2	2	2	2	2	3	3	1	2	2	2	3	0	2	3	3	2	3	3	2	2	2	2
191	24	2	3	3	1	3	4	0	0	1	3	4	3	2	1	2	0	2	1	3	3	3	1	3	0	0	3	4	1	3	0	4	1	3	3	2	3	3	0	3	2	4	4	2	0	4	3	4	3
192	18	2	2	1	2	2	3	1	2	1	2	2	3	0	3	3	1	3	0	2	1	3	1	3	0	1	2	4	2	4	2	4	0	2	2	2	2	2	0	2	2	2	1	3	2	3	1	4	2
193	22	1	1	1	0	0	2	0	4	4	0	1	4	3	0	0	4	4	0	2	2	4	0	0	0	2	0	3	2	4	4	2	0	2	2	1	1	3	0	4	3	2	2	2	2	4	2	3	2
194	23	1	0	1	2	2	1	0	1	1	2	3	1	3	2	1	3	4	2	1	2	3	1	2	1	2	1	3	1	2	3	2	2	3	1	1	1	3	1	2	1	3	3	2	2	3	1	4	1
195	19	2	2	2	2	1	1	2	3	1	2	2	3	2	2	2	3	3	1	1	3	3	1	1	0	2	3	2	1	3	3	3	2	2	2	3	3	3	0	3	2	3	2	2	2	4	2	2	3
196	20	1	3	1	1	0	1	0	1	0	0	1	3	1	4	1	2	4	1	2	2	4	0	0	0	2	1	2	0	4	4	3	2	3	3	1	1	4	0	4	1	2	3	2	3	4	1	4	1
197	19	2	3	1	2	3	3	0	1	2	2	1	2	2	2	1	2	2	2	2	1	3	1	2	2	1	1	3	2	1	2	3	1	2	3	2	2	2	1	1	2	3	2	1	0	2	2	3	2
198	19	2	1	1	1	1	1	1	2	3	3	3	2	3	2	0	1	3	2	1	1	3	1	2	0	1	1	2	2	2	1	2	2	1	2	1	1	3	0	1	1	2	4	1	1	3	2	3	2
199	24	1	2	2	3	3	2	2	2	1	3	2	2	2	3	3	1	3	3	3	2	2	1	3	1	1	2	1	1	2	3	2	2	1	2	2	2	3	1	3	1	1	3	2	2	3	2	2	3
200	18	1	1	2	1	0	0	0	2	3	1	4	3	0	1	1	2	4	0	3	4	2	1	0	0	0	2	2	3	1	4	2	0	1	2	0	4	3	0	4	2	2	2	3	2	3	0	4	3
201	18	1	2	2	3	3	3	3	0	2	4	1	3	2	3	3	0	3	3	2	1	3	3	3	2	2	2	3	4	3	0	2	3	3	2	2	2	2	1	1	2	2	3	1	2	3	2	3	3
202	23	1	2	0	3	1	3	0	3	2	1	2	2	2	1	2	3	4	2	1	2	2	3	1	0	0	4	2	0	1	4	2	2	2	2	2	3	4	0	3	0	2	3	2	0	2	2	2	1
203	21	1	2	4	0	4	2	0	4	0	0	0	4	0	3	0	0	4	0	4	0	2	1	0	4	0	4	0	2	2	2	3	0	4	4	4	1	4	0	4	2	4	2	3	0	3	2	4	1
204	20	2	2	1	1	2	3	1	1	1	1	3	3	1	4	4	0	2	3	2	3	1	1	0	0	0	0	2	1	2	3	2	2	3	2	1	1	2	0	1	2	3	3	2	4	2	2	3	3
205	22	1	4	0	0	3	1	4	0	4	4	4	2	1	4	0	0	4	1	1	0	1	0	1	0	4	4	4	4	4	4	3	0	3	4	2	4	0	0	0	3	1	0	3	4	4	4	4	4
206	21	1	3	3	2	1	4	1	2	3	2	3	4	1	4	3	3	4	1	3	1	3	2	1	1	3	3	2	2	3	4	1	0	2	2	2	3	2	2	2	2	3	1	4	3	3	1	3	1
207	22	1	3	2	3	3	3	2	3	4	2	4	3	1	2	4	0	1	2	1	3	1	4	3	3	4	2	4	3	3	1	3	3	2	2	2	1	3	1	1	3	3	2	2	3	3	3	3	4
208	23	2	3	2	2	2	2	2	3	3	3	1	2	2	2	2	2	2	3	1	2	2	2	2	0	2	2	3	3	1	2	2	3	2	2	2	2	1	0	1	2	2	2	2	1	2	2	3	4
209	25	1	2	1	2	2	3	0	2	2	3	2	3	1	3	3	2	2	2	2	1	3	2	2	1	3	1	2	2	2	2	2	2	2	3	2	3	1	3	2	2	3	3	2	1	2	2	2	2
210	21	2	1	2	3	1	2	2	2	1	3	1	1	3	1	3	3	3	1	1	3	1	3	1	0	2	2	1	1	1	3	2	1	2	0	1	2	3	0	3	1	3	4	2	2	2	1	3	2
211	20	2	3	3	2	2	3	3	2	1	3	3	2	3	2	3	0	2	3	4	3	1	3	4	0	4	2	4	3	1	1	3	3	2	3	4	3	0	0	2	2	4	3	3	4	3	4	4	3
212	23	1	1	2	3	2	3	3	1	1	3	1	3	2	2	3	1	2	2	2	2	2	2	2	0	2	2	1	2	1	2	2	2	1	2	2	3	2	2	2	1	1	3	1	4	2	2	2	2
213	18	2	2	2	1	2	2	0	3	2	2	0	3	1	3	2	2	3	1	2	2	3	3	1	1	1	2	3	1	2	3	2	1	3	1	2	2	2	0	2	2	2	2	1	3	3	2	3	0
214	23	1	4	2	4	1	3	2	1	4	3	2	4	1	3	1	0	1	3	2	3	3	2	3	0	1	1	4	3	1	0	4	2	3	2	1	2	1	0	2	4	2	1	3	3	2	1	2	3
215	21	1	1	2	2	3	2	1	3	2	2	1	2	3	1	2	2	3	2	1	2	3	1	3	0	3	1	2	2	2	3	1	2	1	2	1	1	3	0	2	1	3	3	2	1	3	2	3	1
216	23	1	2	2	3	2	3	0	2	2	3	2	3	2	2	1	1	2	2	2	2	1	1	2	1	1	2	1	2	2	1	3	2	2	3	2	2	3	1	2	0	2	2	3	2	2	2	2	2
217	22	2	2	3	3	1	4	0	2	1	3	1	4	2	3	4	4	4	2	3	3	3	4	0	1	3	2	3	1	3	4	3	1	3	3	4	3	2	1	3	2	3	1	2	3	2	1	3	1
218	23	2	2	1	3	2	4	0	2	1	0	3	1	3	1	2	3	4	2	2	3	2	4	0	0	4	2	4	2	3	4	4	0	2	3	3	1	4	0	4	2	4	1	4	4	4	2	4	1
219	25	2	2	1	3	3	1	0	2	3	3	0	4	2	2	2	2	3	1	2	3	4	1	3	0	2	3	3	3	2	3	3	1	2	2	3	2	3	3	3	0	3	2	1	0	2	2	3	2
220	23	2	2	2	3	2	4	2	3	4	4	1	4	2	2	1	4	4	1	2	4	4	2	1	0	2	0	4	0	4	4	3	1	2	2	2	1	4	1	3	1	4	2	3	4	4	1	4	0
221	24	2	1	1	0	0	2	2	3	1	3	2	4	2	1	1	2	2	1	1	1	4	1	1	1	3	2	4	3	2	3	2	1	2	2	1	1	1	0	2	3	2	2	2	4	4	2	2	2
222	24	1	3	0	1	0	3	3	3	3	0	1	2	3	2	1	2	3	2	3	3	4	4	1	0	3	1	2	0	4	2	4	3	3	2	2	3	4	0	4	3	1	2	2	4	0	3	4	4
223	26	2	1	1	2	1	4	0	2	2	3	1	3	0	3	4	1	2	0	3	1	4	1	1	0	3	2	2	3	3	4	3	0	3	2	3	2	2	1	3	0	4	0	4	2	3	1	3	1
224	24	2	1	0	1	2	2	1	0	4	1	4	4	3	1	3	2	2	2	1	2	3	1	0	1	2	2	3	1	2	3	3	2	1	4	1	2	3	2	1	0	3	3	2	2	4	1	4	2
225	25	1	1	1	2	2	2	3	2	1	3	1	2	2	3	2	2	1	2	3	2	2	2	3	2	2	3	2	2	3	2	2	2	3	3	3	2	2	1	2	0	2	2	2	2	2	3	2	2
226	21	2	2	3	3	2	3	1	1	1	2	0	3	2	3	3	2	1	1	3	2	0	1	3	3	4	1	2	2	3	1	2	3	4	3	3	1	2	3	0	2	2	0	1	3	4	3	3	2
227	20	2	2	3	1	2	2	1	3	3	2	3	2	1	2	2	3	2	2	2	3	2	2	1	1	2	3	3	2	3	2	2	1	2	3	2	1	2	2	2	2	2	3	3	2	2	1	1	2
228	22	1	3	1	2	2	4	1	2	2	1	2	2	4	3	2	2	3	1	2	1	3	3	1	0	2	1	3	1	1	4	2	1	3	2	1	3	0	0	3	0	4	2	3	1	3	1	3	1
229	23	1	3	2	1	3	4	1	3	2	3	1	3	1	1	4	2	3	1	4	2	2	1	2	1	1	4	1	2	3	3	2	1	1	3	3	3	3	2	2	1	3	2	3	2	3	2	4	1
230	22	1	1	2	2	2	2	0	2	3	2	2	3	3	2	2	2	3	3	2	1	2	1	2	1	1	3	3	2	2	2	2	3	2	3	2	1	2	2	1	2	2	2	1	2	3	2	3	3
231	20	2	2	1	3	3	2	3	1	2	3	3	2	3	3	3	1	2	3	2	0	2	1	3	0	3	1	3	2	3	2	3	3	2	3	3	2	2	0	2	1	2	4	2	3	3	2	4	2
232	21	2	3	1	3	2	3	0	1	2	4	1	3	2	3	3	2	2	1	3	1	3	3	2	0	0	1	2	1	3	3	3	1	4	3	2	3	3	1	1	2	2	1	1	0	4	1	4	1
233	20	2	1	0	2	2	2	1	1	3	3	1	2	2	2	2	1	1	2	1	1	3	1	3	1	2	2	3	4	3	1	3	3	1	3	3	2	1	2	0	1	1	3	1	2	2	2	3	3
234	20	2	3	1	3	1	4	2	3	1	2	3	3	2	3	3	2	3	3	3	3	3	3	2	2	2	4	3	3	3	3	4	3	3	3	4	3	2	2	2	2	3	2	2	3	2	3	4	4
235	21	2	0	1	1	2	3	1	3	4	0	1	4	1	1	0	3	4	0	2	2	4	1	0	0	2	1	4	1	1	4	4	1	2	2	2	3	2	0	2	2	2	3	0	1	4	1	4	3
236	21	2	1	0	2	3	3	2	2	2	3	2	2	4	2	2	1	1	2	2	1	3	2	2	0	3	2	2	3	1	3	3	2	3	3	2	2	1	1	1	1	3	3	2	4	3	1	2	1
237	20	2	1	1	2	2	3	0	2	1	1	4	3	3	1	3	1	1	1	2	0	0	1	0	0	0	2	3	3	3	2	3	2	3	3	3	2	0	0	2	1	4	1	3	1	2	3	3	2
238	20	2	2	1	2	1	4	3	2	1	1	1	3	0	3	2	1	3	1	2	2	2	1	1	0	2	2	2	1	3	2	1	2	2	3	1	0	4	1	2	0	3	2	2	4	3	1	3	2
239	20	2	3	1	1	2	2	0	1	1	2	2	3	2	4	1	1	2	1	3	2	3	3	2	0	2	3	3	3	3	3	2	1	3	3	2	4	2	1	1	2	1	3	2	0	3	1	2	1
240	21	2	1	1	1	3	1	2	1	2	3	4	2	3	1	1	1	3	3	1	2	3	1	2	0	3	2	2	2	1	1	2	3	2	1	1	2	2	1	1	1	1	2	1	2	3	3	3	4
241	19	2	2	0	2	1	2	0	2	2	2	2	2	2	2	1	2	3	3	1	2	3	1	2	2	2	3	1	4	3	3	1	3	2	2	2	2	2	2	2	2	3	2	1	1	1	1	2	2
242	19	2	3	2	1	1	3	1	3	2	0	0	3	1	3	1	4	3	0	3	2	3	3	1	0	3	3	1	0	3	3	2	1	3	3	4	2	2	0	3	2	3	1	3	2	3	1	4	1
243	19	2	2	3	2	2	3	3	1	2	3	2	3	1	4	3	2	1	3	2	3	2	3	4	4	4	3	3	1	2	3	2	3	4	3	3	2	2	1	2	3	2	1	2	2	2	3	3	2
244	18	2	2	2	2	3	2	1	1	2	1	2	3	2	2	2	1	2	1	2	3	2	4	2	3	2	1	2	3	3	2	1	3	4	2	2	2	2	2	1	1	3	3	2	4	2	2	2	2
245	18	1	2	3	1	2	4	2	3	1	2	1	4	1	3	2	2	4	2	3	2	2	3	1	1	2	3	1	2	2	3	4	1	2	3	3	3	4	2	3	3	4	1	3	2	2	2	3	1
246	26	2	1	2	2	3	4	1	3	2	3	3	3	2	1	2	1	3	3	2	2	2	1	3	4	2	3	2	2	2	3	3	2	2	2	2	3	3	3	1	1	2	2	1	1	3	2	3	2
247	19	2	3	3	1	1	3	0	3	0	2	1	3	2	2	1	2	3	2	4	2	2	1	2	0	2	4	3	2	3	4	3	1	2	3	3	4	2	0	1	0	3	3	3	1	1	1	3	0
248	21	1	2	1	0	3	2	1	2	1	4	2	2	3	1	2	0	3	2	1	1	2	2	4	0	1	2	2	3	2	1	3	2	1	2	2	1	3	0	1	0	4	2	2	1	0	2	3	4
249	18	2	1	1	1	2	4	2	2	2	4	3	3	4	1	3	1	4	4	1	3	3	1	4	0	3	2	1	4	3	1	3	4	1	3	1	1	3	0	1	1	2	3	1	3	1	3	3	1
250	18	2	1	2	3	4	4	2	3	2	4	0	3	4	1	2	2	4	1	3	2	2	2	3	0	3	3	2	3	3	4	4	0	3	3	2	3	3	1	2	0	3	0	2	2	2	2	4	0
251	20	2	1	1	2	1	1	2	4	2	0	3	2	1	2	3	3	4	0	2	2	3	2	0	0	1	0	1	0	3	4	3	0	2	4	2	2	4	0	4	3	3	1	2	2	4	0	4	1
252	22	1	3	2	1	2	3	0	3	3	1	1	4	2	3	2	4	4	0	2	3	4	2	1	0	2	3	3	2	3	4	3	1	2	3	2	3	3	0	3	1	4	3	3	0	3	2	3	1
253	21	1	1	2	4	2	3	1	2	0	2	1	3	1	1	3	2	2	3	3	2	3	3	0	0	3	2	3	1	3	3	3	1	1	2	2	4	3	0	3	2	2	0	2	1	4	3	4	1
254	18	2	2	1	1	2	3	2	1	1	2	3	3	3	2	3	1	2	3	3	2	1	1	1	0	1	1	2	1	2	3	2	3	2	3	2	2	3	0	2	0	4	3	2	3	1	3	4	3
255	19	2	1	2	1	3	4	1	3	3	3	1	4	1	2	3	0	2	1	4	0	2	1	2	3	2	4	4	4	3	0	4	2	1	3	3	1	2	2	0	3	4	4	1	0	4	4	4	3
256	18	2	3	2	2	3	3	1	1	0	1	2	3	0	3	3	1	4	0	2	3	3	0	2	0	1	3	1	1	2	3	4	1	1	2	4	2	3	1	2	1	3	1	3	2	2	1	4	3
257	19	2	1	2	3	0	2	4	1	1	0	3	3	2	1	1	4	2	1	3	3	1	3	0	2	2	1	1	2	2	3	1	1	3	2	1	1	4	0	4	0	2	3	3	4	0	4	3	3
258	19	1	2	2	1	3	1	0	3	1	0	3	1	1	2	0	1	3	0	3	2	2	1	0	0	0	1	0	1	3	4	3	2	3	3	2	3	2	0	3	3	3	1	1	1	4	2	3	3
259	20	1	4	3	4	4	4	2	2	0	2	0	4	1	4	2	3	3	1	4	4	4	3	3	0	4	1	4	1	4	4	4	0	4	4	4	4	3	2	3	3	3	0	4	3	4	0	4	2
260	21	2	3	1	2	2	3	1	3	2	1	2	1	3	2	2	2	3	2	2	1	2	1	1	2	3	3	3	1	1	3	2	2	3	2	3	3	1	1	3	1	2	3	2	1	2	2	3	3
261	20	2	2	1	1	2	2	0	3	3	1	1	2	2	1	1	3	3	2	1	2	3	2	2	1	2	2	1	2	1	3	3	1	2	2	2	2	3	1	3	1	2	3	2	1	3	2	2	2
262	21	2	1	0	1	3	1	3	1	0	1	2	2	1	3	2	1	1	2	2	4	2	4	2	0	4	4	3	2	3	2	4	2	4	2	2	3	1	0	2	3	2	1	2	3	3	2	4	2
263	22	2	3	3	2	3	3	0	1	2	3	1	3	2	2	1	1	2	3	3	3	2	1	2	0	1	3	2	1	2	3	2	2	2	3	3	2	4	0	3	1	2	1	2	0	1	2	3	1
264	19	2	4	3	1	3	2	4	0	0	3	1	4	0	4	4	1	3	2	3	1	3	3	2	0	2	1	3	2	2	3	3	1	2	2	3	3	1	1	2	4	2	2	3	3	3	2	3	1
265	23	1	1	3	0	2	1	3	2	1	0	3	2	1	0	1	4	2	1	1	2	2	2	1	1	3	1	0	2	2	4	1	1	2	2	2	3	0	0	3	3	2	1	2	3	1	2	3	1
266	20	2	1	1	1	3	1	3	1	3	3	3	1	3	1	1	2	3	2	0	1	4	3	3	0	0	0	3	3	1	2	3	2	1	1	1	2	3	3	3	2	1	3	4	4	3	3	2	2
267	23	2	1	0	3	3	3	0	2	1	3	1	4	3	1	3	2	4	2	2	3	2	1	1	0	0	1	1	2	3	2	4	3	1	4	1	3	2	1	2	0	3	3	2	2	1	3	4	3
268	19	2	2	0	1	2	4	3	3	1	2	2	3	1	2	2	1	2	3	3	2	2	3	3	0	2	3	3	3	2	1	3	2	3	3	2	3	1	0	1	2	3	4	1	1	3	2	3	2
269	18	2	1	2	1	1	3	3	1	1	1	2	3	2	1	2	2	2	2	2	1	2	2	2	0	2	2	2	2	3	3	2	2	2	2	2	2	3	1	3	2	2	2	2	2	4	3	3	2
270	19	2	1	1	2	2	3	0	3	3	3	0	3	0	1	3	1	2	0	3	1	2	1	3	1	1	3	1	2	3	3	3	1	1	1	2	3	2	0	3	4	4	2	2	1	2	3	3	2
271	18	2	1	0	1	2	1	0	1	0	2	1	2	4	1	1	2	3	4	2	1	1	1	1	0	4	1	0	2	3	2	1	2	1	2	1	2	3	0	4	0	2	3	2	0	1	2	3	0
272	18	2	2	0	0	2	1	0	3	2	0	4	0	1	2	2	3	3	1	2	1	1	1	0	0	1	2	0	2	1	4	0	1	1	2	2	3	2	2	3	1	3	1	2	2	1	2	4	2
273	20	2	3	3	2	1	2	3	1	1	1	3	3	2	3	3	1	3	1	3	3	2	3	2	4	3	3	1	1	3	4	3	1	2	3	2	3	2	4	3	2	3	2	3	2	4	2	2	2
274	22	2	2	1	3	2	2	2	1	1	3	2	3	3	3	3	1	2	2	1	2	1	2	1	2	3	1	4	1	2	3	2	2	3	3	1	2	3	0	2	2	2	3	1	4	3	2	1	3
275	20	2	2	1	1	2	1	3	3	3	1	3	2	3	3	2	2	3	2	2	2	3	1	1	2	3	2	3	3	3	3	3	1	3	3	1	1	3	2	3	2	1	2	2	1	2	2	2	2
276	20	2	2	0	1	3	2	3	3	3	0	3	3	1	3	3	2	3	1	2	3	0	1	1	0	3	2	3	2	2	3	2	1	3	2	1	3	1	0	1	3	3	3	3	3	3	2	3	2
277	20	2	3	0	2	0	2	2	1	1	1	3	3	2	4	2	4	3	2	3	1	2	3	1	0	2	0	2	0	1	4	2	1	3	2	4	3	3	1	3	0	3	3	2	2	3	2	3	3
278	20	2	2	1	0	2	1	0	3	1	1	1	3	3	1	0	2	3	2	1	2	3	2	1	0	2	1	2	1	3	3	2	2	2	3	1	1	1	0	3	3	2	2	2	0	4	2	4	1
279	21	2	2	2	2	3	2	0	3	2	1	3	3	2	3	2	2	2	3	3	3	3	1	0	0	4	3	3	2	3	4	4	1	3	3	3	3	0	0	2	3	3	3	3	1	3	3	4	2
280	21	2	1	3	1	3	2	0	2	1	2	3	3	3	1	2	2	4	3	3	4	3	1	2	0	0	3	3	2	4	3	3	3	3	3	2	2	4	0	1	1	2	3	1	3	3	2	4	2
281	20	2	3	2	2	4	4	1	3	1	4	3	3	2	1	1	2	1	1	3	1	1	1	2	2	2	4	3	1	3	3	3	2	3	3	4	3	3	1	3	2	3	3	2	1	0	3	4	2
282	22	2	3	0	3	3	3	3	1	3	0	3	3	3	4	3	0	3	4	1	4	3	2	4	0	3	2	4	1	1	1	1	3	4	2	3	2	1	0	2	0	3	4	3	1	2	2	3	3
283	19	2	1	2	1	2	2	1	3	1	2	4	4	4	1	1	1	4	4	2	2	4	2	0	0	0	2	4	1	2	2	2	3	1	1	1	1	2	0	2	0	4	3	1	2	3	2	3	3
284	20	1	3	3	3	3	3	3	2	2	3	2	3	3	4	3	1	2	3	3	3	1	2	3	0	3	1	3	1	4	2	3	3	4	4	3	2	3	2	1	1	3	2	1	3	3	2	4	2
285	19	1	3	3	3	3	3	0	3	2	2	3	2	4	2	3	2	3	2	3	1	2	3	1	0	1	2	0	1	3	3	3	2	3	2	2	2	3	0	3	0	3	2	3	0	1	1	4	2
286	22	2	1	3	1	2	3	0	4	1	2	1	3	0	2	2	2	3	0	3	1	3	3	0	2	1	3	3	1	3	4	3	0	2	3	2	2	3	2	3	0	3	1	3	1	1	2	3	1
287	21	2	1	0	1	2	2	0	1	0	4	3	3	3	1	3	0	2	3	2	1	3	3	3	2	1	2	3	3	1	1	3	3	1	2	1	1	2	1	0	2	1	3	1	2	3	2	3	3
288	21	2	2	3	4	2	3	0	2	2	2	2	3	1	1	3	1	2	2	3	2	3	1	1	0	0	2	3	3	2	3	3	2	3	3	2	3	3	1	2	1	4	1	3	2	3	2	4	2
289	26	2	3	3	3	3	3	3	2	1	3	3	3	4	4	2	1	4	3	2	3	0	2	2	0	2	2	2	3	3	3	3	1	1	2	3	2	3	0	1	2	2	2	1	3	3	1	4	1
290	26	1	2	3	0	0	1	0	4	2	0	0	4	0	3	0	4	3	0	2	3	4	0	0	1	3	2	3	0	2	4	3	0	3	4	3	2	1	0	4	3	3	1	3	4	4	0	4	0
291	19	2	1	3	3	2	3	1	2	2	4	3	3	3	1	1	1	4	2	2	2	2	3	4	1	1	2	3	2	2	3	4	2	2	3	1	3	2	2	1	2	2	3	2	2	3	2	4	3
292	18	2	4	1	2	1	3	2	2	1	3	1	4	0	2	1	2	4	1	2	3	3	3	1	0	2	3	4	2	4	4	4	1	3	4	3	1	2	4	2	2	3	1	3	4	4	3	4	1
293	22	1	3	3	1	3	1	3	1	3	2	0	4	0	4	2	1	3	0	1	3	4	1	4	4	2	1	3	4	4	1	3	0	2	3	4	1	4	3	2	3	2	1	2	4	1	3	4	2
294	19	2	3	0	2	3	4	2	0	1	3	4	2	3	3	4	0	1	2	2	0	0	2	2	1	1	3	4	3	4	0	0	2	3	2	1	2	1	2	1	2	2	4	2	1	4	3	2	4
295	19	2	0	4	0	1	2	1	2	2	3	0	4	0	1	1	3	4	2	1	4	4	2	0	1	3	0	4	1	4	3	4	2	0	1	1	2	0	0	4	2	4	0	2	3	4	1	4	0
296	20	1	0	4	3	2	3	3	2	0	4	1	4	0	1	1	2	3	1	2	4	3	1	3	4	1	3	4	4	2	2	4	1	2	3	3	4	3	3	2	4	3	2	1	2	3	3	4	2
297	19	2	1	0	1	2	2	0	2	2	3	3	2	4	0	1	2	3	1	2	0	3	0	2	0	0	1	1	1	1	4	2	1	1	1	2	1	2	0	3	0	4	3	1	0	3	2	3	1
298	19	1	1	4	4	1	3	3	2	1	4	2	3	1	3	3	0	1	1	4	1	0	1	2	0	0	4	3	2	4	3	4	1	2	4	4	3	2	1	3	2	3	3	2	3	1	3	4	1
299	23	2	3	1	1	3	1	3	1	0	2	1	3	0	2	2	1	1	0	1	2	4	2	1	4	2	1	2	3	3	3	3	0	3	3	3	3	4	4	3	2	4	2	3	3	1	2	1	3
300	19	2	2	0	3	2	1	0	2	1	0	3	3	4	2	3	4	4	3	2	2	4	2	1	2	2	0	2	0	3	4	3	3	2	3	2	2	3	0	3	1	2	2	2	1	4	1	3	1
301	18	2	1	0	3	3	1	2	2	3	3	2	4	3	2	1	3	2	3	1	3	3	4	1	0	2	1	3	2	1	3	3	3	0	2	2	2	2	0	2	2	3	3	2	3	2	2	4	1
302	18	2	1	2	3	3	3	3	2	0	3	3	3	2	2	3	1	1	2	3	3	3	1	4	0	2	2	2	1	2	3	3	1	4	1	2	3	2	2	1	2	3	2	2	2	1	2	3	3
303	19	1	1	1	0	2	2	0	3	1	1	1	3	1	1	1	3	3	1	3	2	1	1	2	0	0	1	3	1	3	3	4	2	1	4	2	2	2	1	3	2	3	1	2	2	2	2	4	2
304	18	2	1	0	0	4	4	0	1	2	4	4	2	2	1	0	0	1	0	2	0	3	0	4	0	1	4	4	4	3	1	1	1	2	2	1	1	0	0	2	1	2	3	1	0	4	3	4	4
305	18	1	2	1	1	3	3	0	3	3	4	2	3	2	2	2	1	2	2	4	2	3	1	3	0	2	2	3	2	1	3	3	2	2	2	3	3	2	2	1	1	2	3	2	1	3	2	3	3
306	19	2	2	1	3	4	4	2	3	2	4	3	3	1	1	2	0	1	1	3	1	2	2	3	0	3	3	3	4	2	1	3	1	3	2	1	3	2	1	0	2	3	3	2	1	4	3	3	3
307	18	2	1	1	1	1	2	1	4	3	0	2	2	1	1	0	4	4	1	2	3	3	2	0	0	0	1	1	0	2	4	2	0	2	2	2	2	3	0	3	1	2	2	1	3	3	1	3	2
308	20	1	1	0	1	3	2	1	2	3	1	3	3	3	1	1	3	3	3	3	2	1	1	1	0	1	1	3	1	2	3	3	3	1	1	1	2	3	0	3	1	2	3	1	1	3	2	3	1
309	21	1	4	0	0	0	3	0	4	1	0	1	4	1	3	0	2	1	0	4	3	4	2	0	0	0	2	1	0	4	4	3	0	3	4	4	4	3	0	4	2	4	0	4	0	4	1	4	0
310	23	1	2	4	1	3	1	0	3	0	3	1	3	3	0	0	2	3	3	1	3	2	0	2	0	1	1	1	2	2	4	2	2	0	2	2	1	4	0	2	0	1	4	0	0	2	2	3	2
311	19	2	2	3	3	1	4	0	3	2	0	1	3	2	2	4	3	4	1	3	3	4	1	0	0	2	1	4	1	3	4	3	0	4	2	3	3	3	3	3	2	4	1	4	1	4	1	4	0
312	21	1	1	1	3	3	3	1	1	2	3	3	2	3	0	1	2	3	4	1	3	1	1	3	2	0	3	2	2	4	2	2	3	1	3	1	2	4	0	1	0	2	4	1	0	3	2	2	3
313	21	1	4	3	4	3	4	4	2	1	4	1	4	0	4	4	2	4	0	4	3	0	4	3	0	1	3	1	2	4	1	4	0	4	4	2	3	4	0	1	0	3	1	4	4	0	1	3	3
314	21	1	2	1	1	2	2	0	3	2	2	2	2	3	1	1	2	3	2	1	1	3	0	1	0	0	1	2	0	1	4	3	1	1	2	2	2	3	0	2	1	2	3	1	0	2	1	3	0
315	21	2	3	3	2	4	2	1	3	3	2	0	2	0	2	2	1	3	2	2	3	4	2	2	0	1	2	3	0	3	1	4	2	3	3	3	3	3	0	2	3	3	2	3	2	4	1	3	2
316	21	1	1	1	2	2	3	2	2	1	2	1	3	1	3	3	1	1	2	3	2	1	2	3	2	3	3	4	3	2	1	3	4	3	3	2	3	2	3	2	3	3	1	3	3	1	3	3	2
317	21	2	2	1	2	2	3	2	2	2	2	1	3	3	3	1	3	3	2	3	2	3	1	1	0	2	2	3	2	2	3	3	2	3	2	1	2	2	0	2	1	3	3	3	3	1	2	4	2
318	21	2	4	3	3	2	4	1	3	0	3	1	3	1	2	3	2	3	2	3	3	2	2	1	0	2	3	3	1	4	3	3	1	2	3	3	3	3	1	2	2	3	1	3	2	2	1	2	1
319	20	2	3	2	4	3	2	4	0	1	4	3	3	1	2	3	1	0	2	1	2	1	1	4	1	4	3	2	2	3	2	3	3	1	3	2	2	2	2	1	3	1	1	1	4	1	3	2	4
320	20	2	4	2	1	3	2	1	2	1	3	3	2	4	2	2	1	4	3	2	3	4	1	3	0	1	2	3	2	3	2	4	2	2	3	1	2	4	0	1	0	3	3	3	2	3	1	4	1
321	18	2	4	4	1	4	2	0	3	1	0	0	4	2	3	2	4	4	0	2	2	2	2	0	0	0	2	2	2	2	2	2	2	2	2	2	2	2	0	4	2	2	2	2	0	4	0	2	2
322	19	1	3	3	3	3	4	3	1	0	4	3	3	1	3	2	1	2	1	3	3	3	3	3	0	3	3	4	3	3	1	4	1	2	3	3	3	1	0	1	3	3	2	2	3	1	2	3	4
323	27	2	1	0	4	2	1	0	2	2	1	1	2	2	0	1	4	4	0	4	1	2	1	1	0	0	0	1	2	2	4	2	0	2	3	3	3	4	0	2	2	4	0	4	2	3	1	4	4
324	27	2	3	1	3	2	4	1	3	2	2	2	3	2	1	2	1	3	2	3	2	2	1	2	0	0	4	3	1	3	3	2	1	2	2	2	2	4	0	2	2	3	2	2	1	3	1	3	2
325	25	1	3	3	4	2	2	4	0	3	2	1	2	0	4	4	0	4	1	2	3	0	4	4	4	4	2	2	2	4	0	1	0	4	3	2	4	3	2	1	1	3	0	3	4	3	2	4	2
326	22	2	2	1	4	3	3	0	2	3	3	2	3	1	2	2	1	4	0	3	3	3	1	1	2	3	3	3	3	3	2	3	1	1	2	1	3	3	1	1	3	3	1	1	2	3	1	3	1
327	24	2	2	0	4	4	1	2	0	0	4	1	1	4	4	1	0	2	4	3	4	1	4	4	0	0	0	1	4	4	0	1	4	4	3	0	3	3	0	0	4	4	4	4	4	0	1	4	4
328	24	2	3	3	2	1	1	2	2	0	2	0	3	1	4	3	1	1	1	3	2	1	4	2	0	1	1	1	2	2	4	4	1	3	2	2	3	0	1	2	1	2	2	2	2	3	1	3	1
329	18	2	0	0	2	1	0	3	3	0	3	1	3	1	1	2	2	2	1	1	1	4	2	1	0	3	0	4	3	4	3	4	0	0	2	0	0	0	0	0	4	2	1	0	4	4	3	3	4
330	18	1	3	3	2	1	2	1	2	1	3	1	3	0	2	3	2	3	1	1	3	3	2	2	0	4	2	3	1	3	3	4	1	1	3	3	3	3	0	2	2	2	2	3	2	4	1	4	3
331	18	2	3	0	2	2	4	4	1	2	3	1	4	2	2	4	1	3	2	3	2	1	1	1	0	2	4	2	2	2	3	3	2	4	2	2	2	3	2	2	1	4	3	2	4	0	2	4	2
332	18	2	4	2	3	4	3	1	2	0	4	2	3	1	3	4	1	4	1	3	2	0	0	2	0	0	0	0	3	1	2	2	0	3	2	3	3	3	0	1	0	3	1	4	1	1	0	4	2
333	18	2	2	2	4	3	2	2	2	2	4	1	4	3	3	3	2	2	4	3	2	2	1	3	0	3	1	4	2	2	1	3	3	2	2	3	3	2	1	2	2	4	1	4	3	2	2	4	4
334	22	2	4	2	1	2	2	0	2	0	3	2	2	4	0	2	2	4	3	3	2	1	0	2	0	0	2	1	1	4	3	4	0	3	4	4	4	4	0	1	0	3	1	3	0	0	2	4	1
335	21	2	3	2	1	1	1	2	1	0	2	3	4	3	2	0	2	3	4	1	4	2	3	3	0	2	2	3	3	4	3	3	3	3	3	1	3	3	2	1	1	3	3	3	3	2	3	4	2
336	23	1	4	1	3	3	3	4	1	1	3	1	3	0	4	2	2	2	2	3	2	1	3	3	3	3	3	4	4	3	2	4	3	3	3	3	3	2	1	1	3	4	1	3	4	2	2	2	3
337	20	2	3	3	1	2	2	3	0	1	2	2	2	3	3	3	1	3	3	2	3	3	3	1	0	2	1	3	2	3	1	3	2	3	4	1	1	3	0	3	1	3	3	2	3	3	2	4	1
338	21	2	3	3	2	1	1	2	0	1	2	3	2	2	1	2	2	3	2	1	2	2	2	2	0	2	0	2	1	3	2	1	2	1	1	1	1	2	0	2	1	4	2	2	4	2	2	4	4
339	22	1	3	3	3	1	2	3	0	1	2	2	2	1	3	3	1	2	1	2	1	3	3	1	0	2	2	1	1	2	2	2	1	3	2	1	1	2	0	3	1	3	1	3	2	1	1	2	1
340	22	1	2	2	3	2	2	2	3	2	1	2	2	2	0	0	4	4	0	2	3	3	1	1	0	0	3	4	1	3	4	3	0	0	3	2	2	4	0	4	0	3	2	1	2	2	2	3	1
341	23	1	2	2	3	1	3	3	2	3	1	2	3	2	2	2	3	4	1	2	1	4	2	1	0	2	1	3	1	1	3	4	1	2	2	1	3	2	0	2	2	3	3	2	2	3	1	3	1
342	20	2	2	0	2	2	1	0	1	4	3	1	3	0	4	2	1	4	1	3	3	3	4	1	0	0	0	4	3	2	3	4	0	4	2	2	3	0	0	1	4	3	1	1	2	3	2	4	3
343	22	2	2	0	3	3	3	1	3	2	1	1	3	1	3	3	4	3	2	2	1	4	2	2	0	3	2	3	3	4	4	3	1	3	3	2	2	3	0	2	1	2	3	2	3	3	2	3	1
344	21	2	1	1	2	2	2	0	2	3	2	2	3	2	1	0	2	4	1	2	2	4	1	1	0	0	1	4	1	3	4	4	1	1	3	3	2	4	0	2	2	3	2	2	1	4	2	4	2
345	19	2	1	2	4	3	3	2	0	2	3	2	3	0	2	3	0	2	0	3	1	2	1	1	0	1	3	4	1	2	3	3	1	2	3	3	3	2	1	2	4	3	4	2	4	3	2	3	2
346	20	2	0	0	3	4	4	2	1	2	4	3	4	4	0	3	0	4	4	2	3	1	2	4	0	1	3	2	4	4	0	4	4	2	3	1	0	2	0	0	1	3	4	1	2	3	4	4	4
347	19	2	2	2	2	2	3	2	2	1	2	3	2	3	2	2	1	3	3	3	2	2	2	2	0	2	2	2	2	1	2	2	3	2	2	2	2	3	0	2	1	2	3	2	2	2	1	2	3
348	19	1	3	1	3	2	3	0	3	1	2	2	3	1	2	2	2	3	1	3	2	2	1	2	0	1	3	3	1	2	4	3	1	2	2	3	3	3	1	3	4	3	2	2	1	3	2	4	2
349	26	2	1	0	1	2	4	0	2	1	4	2	4	1	2	1	0	3	2	4	0	2	1	2	0	0	4	2	3	2	3	3	2	2	1	2	1	1	1	3	3	4	3	3	1	2	2	3	1
350	19	2	1	0	2	3	4	1	3	3	4	4	3	3	0	1	0	3	4	3	2	2	0	4	0	2	4	2	4	2	2	3	4	1	3	1	1	4	0	2	0	1	4	0	1	2	3	4	4
351	19	2	3	0	2	2	4	4	1	2	3	1	4	2	2	4	1	3	2	3	2	1	1	1	0	2	4	2	2	2	3	3	2	4	2	2	2	3	2	2	1	4	3	2	4	0	2	4	2
352	18	2	2	1	3	2	2	0	3	2	3	2	1	3	1	2	0	4	1	1	2	4	1	2	0	0	2	3	2	4	2	1	1	1	2	1	1	4	0	2	3	2	3	1	2	3	2	2	2
353	18	2	3	0	0	2	3	2	3	0	0	1	3	1	1	2	4	2	2	2	2	0	1	0	0	2	1	0	0	2	4	3	0	3	3	4	3	2	0	2	2	3	2	3	3	4	3	3	1
354	18	2	0	0	3	3	2	2	1	0	1	2	2	4	3	3	3	2	2	4	1	1	2	2	2	2	0	1	3	3	2	2	2	1	3	2	2	1	2	1	2	3	2	2	1	2	2	3	4
355	18	2	1	2	1	1	2	1	2	3	1	1	3	1	2	2	3	2	0	3	2	3	1	1	0	2	2	2	1	1	4	2	0	2	1	1	3	3	1	3	2	2	2	1	1	3	2	2	1
356	18	2	1	3	0	2	0	1	0	2	3	1	2	0	4	2	1	2	1	2	0	2	2	4	0	4	1	3	2	0	4	3	0	2	2	1	2	0	0	2	3	4	1	2	2	3	3	3	3
357	18	2	2	0	2	2	2	1	2	0	2	3	2	2	3	2	0	1	1	2	0	0	1	1	0	1	1	2	2	1	3	1	0	2	1	2	2	1	0	2	2	3	1	3	1	3	2	2	2
358	18	2	2	1	3	2	2	0	2	3	3	2	1	1	3	2	4	1	1	0	2	3	2	2	0	1	2	2	1	1	2	1	0	2	1	3	1	2	3	3	2	2	3	1	1	1	2	0	3
359	18	2	3	0	4	3	1	4	0	3	1	1	4	0	3	4	1	1	1	1	3	4	4	2	0	4	1	4	0	1	2	4	1	4	1	4	3	4	0	1	3	3	2	1	3	4	1	4	2
360	18	2	2	3	3	2	1	0	1	4	0	3	4	0	2	4	3	4	0	4	4	2	4	0	0	0	0	4	0	4	4	4	0	2	4	3	1	4	4	3	3	3	2	3	2	4	4	4	3
361	18	2	1	3	1	2	2	0	2	0	1	3	2	2	0	0	2	4	1	1	1	1	3	1	0	0	2	0	2	2	4	2	2	1	3	1	1	2	0	3	2	1	2	0	1	2	3	4	3
362	18	2	0	2	0	4	4	1	3	1	3	2	1	2	0	0	1	3	3	4	1	2	1	3	0	0	4	3	4	2	1	4	4	1	2	2	3	3	0	0	2	4	2	1	2	2	2	3	0
363	19	2	4	2	1	1	3	0	3	2	0	1	4	1	3	3	1	3	0	3	2	2	2	1	1	1	3	2	1	3	4	3	1	3	2	3	4	3	1	3	0	4	3	3	1	3	1	3	1
364	23	1	1	3	1	1	3	0	3	1	4	2	4	3	1	1	2	4	1	3	3	2	0	1	4	0	2	0	1	3	4	4	1	1	4	4	3	4	0	3	0	4	2	1	0	1	2	4	4
365	19	1	1	1	1	2	1	2	2	2	2	2	3	2	2	1	2	3	2	2	1	2	2	2	0	1	1	1	2	2	3	2	2	1	3	1	2	3	0	1	1	3	2	2	2	3	2	3	3
366	21	1	3	3	2	1	3	1	3	2	2	1	3	1	3	1	3	3	0	3	3	1	0	1	1	3	2	2	1	2	4	1	1	3	3	3	3	2	2	3	1	3	1	3	3	1	2	4	2
367	24	1	4	3	1	3	3	0	1	1	3	0	4	0	4	1	1	3	0	3	1	1	1	3	0	2	4	1	1	1	4	4	1	3	2	1	3	1	1	1	0	2	0	2	0	0	2	3	0
368	18	2	0	1	3	2	1	2	2	3	1	3	2	3	0	1	1	2	3	1	2	3	2	0	0	2	1	3	1	3	0	1	3	1	3	1	1	3	2	2	2	2	3	1	4	4	3	3	3
369	19	2	2	1	2	3	4	0	3	2	3	1	3	0	2	1	2	3	0	3	2	3	2	1	0	1	1	4	2	3	4	2	0	2	2	2	2	3	0	3	2	4	2	2	0	4	1	4	2
370	21	1	1	1	1	2	2	1	2	2	2	1	3	1	2	0	2	3	1	3	1	1	0	2	0	0	3	1	1	3	4	1	1	2	3	3	3	3	0	4	1	3	2	2	1	3	2	3	2
371	21	1	3	4	1	2	1	1	2	0	1	2	4	2	1	2	3	2	1	2	4	2	3	1	4	3	1	3	1	4	4	4	2	3	4	4	3	3	4	2	2	3	2	2	2	3	2	4	2
372	19	2	3	2	2	2	3	1	2	2	2	2	3	2	2	1	2	4	2	1	3	3	1	2	0	1	1	2	2	3	3	3	2	3	4	2	2	3	0	2	2	3	2	2	2	3	1	4	1
373	18	2	1	0	1	0	2	0	2	0	2	1	4	0	1	1	1	3	0	3	2	1	0	1	0	0	3	1	0	3	4	4	0	2	2	2	1	4	0	2	0	3	1	3	0	4	3	3	0
374	18	1	3	3	1	1	1	1	2	1	3	3	4	3	1	1	2	4	0	2	4	4	0	0	0	2	2	3	1	3	4	4	0	2	3	2	2	3	0	2	1	4	1	3	3	4	1	4	0
375	18	1	4	2	0	4	4	2	1	1	4	3	4	0	1	4	0	3	0	4	2	2	0	4	0	2	4	2	2	4	3	2	0	3	4	2	4	1	0	2	0	4	1	4	2	1	0	3	4
376	19	2	2	3	3	2	4	1	2	2	2	1	3	1	3	4	1	3	2	4	3	3	0	3	0	1	4	2	2	4	3	4	0	2	4	4	4	2	2	0	2	4	1	4	2	3	1	4	2
377	19	2	3	1	4	4	3	1	0	3	2	3	3	2	4	4	0	3	1	2	2	3	2	3	4	1	2	2	2	4	1	2	0	1	4	2	2	3	4	3	3	3	2	2	2	3	2	2	4
378	19	2	2	1	2	2	3	2	2	2	2	1	3	3	3	1	3	3	2	3	2	3	1	1	0	2	2	3	2	2	3	3	2	3	2	1	2	2	0	2	1	3	3	3	3	1	2	4	2
379	18	1	2	3	2	2	1	1	1	1	2	1	3	1	3	1	2	3	2	1	3	2	3	2	2	4	2	4	3	3	3	4	2	2	2	1	2	3	1	2	1	2	2	2	1	2	2	3	2
380	21	2	3	0	4	4	4	0	0	0	4	1	2	4	4	1	0	1	4	4	1	0	0	4	0	2	1	0	2	1	0	1	4	2	4	1	1	3	0	0	0	4	4	1	0	0	2	3	4
381	22	1	2	3	3	4	3	2	0	1	4	4	3	1	2	1	0	4	1	2	4	4	1	4	4	3	4	4	3	4	0	4	3	3	3	1	2	3	4	0	3	1	3	1	3	3	3	4	4
382	18	1	1	0	1	3	2	1	3	2	2	4	2	2	2	1	2	2	2	1	2	2	2	1	2	2	1	2	2	1	3	2	2	3	1	1	1	2	0	2	2	2	4	0	4	4	2	3	3
383	18	2	2	2	1	3	4	0	3	2	2	3	3	2	1	1	1	2	1	3	2	2	1	3	1	2	2	2	1	2	2	3	1	1	3	2	2	2	1	1	2	2	3	2	1	3	1	3	3
384	20	1	1	2	3	3	3	0	2	1	3	3	4	1	1	3	0	3	3	4	3	1	1	3	0	1	3	0	3	4	1	3	2	2	3	1	3	4	0	0	0	0	3	2	0	1	2	4	3
385	22	2	3	1	2	2	2	1	2	2	3	1	2	1	4	3	0	2	1	2	3	3	3	4	1	3	0	4	2	2	2	2	2	3	2	2	3	3	2	1	4	3	2	2	3	4	2	1	3
386	22	1	0	3	2	1	2	0	3	1	2	2	2	2	2	2	3	4	3	4	4	2	0	1	0	0	4	3	1	3	1	3	3	3	2	1	3	1	0	1	0	3	3	2	3	1	1	4	4
387	21	2	0	2	2	1	2	1	1	1	2	3	2	1	2	2	2	0	1	2	2	2	3	2	0	2	1	0	1	1	2	1	1	2	2	1	2	1	3	2	1	2	2	1	4	2	1	2	3
388	21	2	0	2	0	0	0	0	2	0	0	1	4	0	4	4	1	2	0	0	1	3	1	1	0	1	0	2	1	2	4	4	0	2	2	2	2	2	0	2	2	2	2	2	2	3	2	2	2
389	22	2	2	3	0	1	1	0	2	1	2	1	3	1	1	0	4	4	1	0	3	4	1	0	0	1	0	3	0	4	4	2	1	0	2	2	2	4	0	3	2	3	2	1	0	3	2	3	2
390	23	2	3	3	3	4	3	4	1	1	4	0	3	0	3	3	0	1	4	3	3	0	3	3	3	4	3	4	3	4	3	1	2	1	2	2	3	2	2	1	2	2	3	3	2	2	1	2	3
391	21	2	2	2	2	2	3	3	1	1	3	3	3	1	3	3	1	3	2	1	3	2	2	4	0	1	2	1	3	4	3	3	1	1	2	1	2	3	1	3	1	1	2	2	3	2	3	3	4
392	21	2	3	3	1	1	2	1	2	2	0	2	3	0	3	1	3	3	2	2	3	3	2	1	0	1	1	2	1	3	4	3	1	2	2	2	3	4	0	3	2	3	1	3	0	2	1	1	3
393	23	2	2	4	3	2	2	3	1	3	1	3	3	1	2	0	2	4	0	2	3	3	3	0	0	1	2	2	0	1	3	3	0	2	2	2	3	3	0	2	4	4	1	3	3	4	2	4	2
394	23	1	3	3	2	2	2	2	3	3	0	1	4	1	3	1	3	3	1	2	2	3	2	1	2	2	1	2	1	3	3	3	1	2	3	4	2	3	3	2	1	3	1	3	2	3	1	2	1
395	19	2	3	3	3	3	3	0	1	1	3	1	3	1	3	1	2	2	2	3	3	3	1	3	3	3	3	3	2	4	3	3	0	1	3	2	3	2	1	3	3	3	3	3	0	3	3	3	1
396	19	2	3	3	2	3	2	2	2	2	3	1	2	2	3	2	2	2	2	3	2	2	2	2	3	2	2	3	2	3	2	3	2	3	2	3	3	0	2	2	3	2	2	2	4	4	2	4	4
397	19	1	0	4	1	1	3	2	3	0	2	1	4	0	1	3	4	4	0	4	4	4	3	1	1	2	3	4	0	3	4	4	0	4	2	2	3	4	0	3	1	4	0	1	2	3	4	4	2
398	20	1	2	0	2	0	4	1	3	2	2	2	3	3	2	4	2	1	4	2	2	3	3	0	4	3	3	4	0	2	4	4	4	2	4	3	1	3	0	1	0	3	3	2	1	4	3	3	2
399	19	2	1	0	3	3	3	1	2	2	3	2	3	3	2	2	1	1	3	2	3	1	3	2	1	0	3	3	4	3	0	3	3	2	4	2	1	1	1	1	1	3	3	3	2	3	3	2	2
400	18	2	2	3	1	1	2	0	3	2	1	3	3	2	1	0	4	4	2	3	1	4	2	2	0	0	3	3	1	2	3	3	1	3	3	3	2	3	2	1	3	4	3	1	2	4	2	3	3
401	18	2	2	1	4	4	3	4	0	4	4	1	4	1	4	4	0	0	2	1	0	4	0	4	1	3	4	4	3	2	0	4	2	4	3	0	0	2	3	2	4	3	1	0	4	4	4	4	4
402	19	1	1	1	2	2	1	0	3	2	2	3	2	3	1	2	2	2	2	1	1	1	1	2	0	1	1	2	1	3	3	3	3	1	3	1	1	3	3	1	1	2	3	1	1	4	2	2	3
403	20	1	1	1	2	3	3	0	1	1	3	4	3	3	0	2	1	2	3	2	1	1	2	3	0	3	3	1	3	2	1	3	3	1	2	1	1	3	1	1	1	2	4	1	1	3	4	3	4
404	19	1	2	2	2	2	3	1	2	0	1	2	1	2	2	0	2	4	1	2	2	2	2	1	2	2	3	2	1	3	3	1	1	2	4	1	2	4	2	2	2	2	2	2	2	2	2	3	2
405	19	2	1	1	2	3	1	0	0	1	0	4	3	4	0	0	2	3	3	3	0	0	2	0	1	0	0	3	3	0	3	3	3	3	1	2	2	3	0	1	0	3	3	1	1	1	3	3	2
406	19	2	1	1	1	3	4	1	3	2	4	2	3	3	1	2	1	1	4	1	3	1	1	3	0	4	3	3	3	1	1	3	3	1	3	1	1	0	1	1	1	3	3	3	1	2	1	4	4
407	18	2	2	3	1	2	1	1	2	2	2	3	3	2	2	1	2	4	2	2	3	3	2	2	0	1	2	2	2	2	2	2	1	2	2	2	2	2	0	2	1	3	2	3	2	2	2	3	3
408	18	1	3	3	2	2	2	2	2	2	2	2	1	2	1	2	1	2	2	2	2	2	3	2	2	1	2	2	2	2	3	3	2	2	2	1	2	4	2	3	1	2	2	1	3	3	2	2	2
409	19	2	1	2	4	2	1	0	1	3	3	2	4	3	0	4	0	3	4	0	4	3	2	3	0	3	0	3	3	4	2	3	3	1	3	1	1	4	0	1	0	2	4	0	0	4	3	4	4
410	18	2	2	1	0	1	1	2	3	2	1	1	3	1	3	1	3	2	1	3	3	3	2	1	1	3	3	3	1	3	4	3	1	3	3	3	2	2	2	3	2	2	1	1	3	3	2	3	1
411	21	1	1	1	2	1	1	0	3	2	2	2	3	2	1	1	2	3	2	1	3	3	2	1	0	2	1	3	1	3	3	2	2	1	2	2	1	2	0	2	1	3	3	1	2	3	3	3	2
412	27	1	1	1	2	3	1	0	2	1	2	3	3	1	0	1	1	2	1	1	2	1	3	4	0	2	4	3	1	3	3	3	4	1	3	2	1	2	0	1	0	3	2	2	4	3	3	4	4
413	23	2	3	1	2	3	1	2	2	1	3	3	2	3	2	3	1	3	3	2	1	2	1	3	0	3	2	3	3	2	1	1	2	1	3	2	2	3	0	1	2	3	3	2	2	1	2	3	3
414	23	2	2	1	1	1	2	2	1	3	1	4	2	2	3	2	1	2	3	2	2	3	3	0	3	3	0	4	1	3	3	2	1	3	3	1	3	3	2	2	2	3	3	2	2	4	2	4	4
415	22	2	4	2	1	0	3	0	2	0	2	0	4	0	3	4	2	1	0	3	4	1	4	2	0	1	0	1	0	2	3	3	1	4	3	3	3	4	0	1	4	2	0	4	4	1	2	3	0
416	20	2	2	0	2	4	1	2	1	1	3	4	2	3	1	1	1	2	4	1	1	2	2	3	4	2	3	1	3	3	1	3	4	0	3	2	1	2	0	1	0	1	4	2	2	0	1	3	4
417	21	2	3	1	1	2	2	3	1	1	2	3	4	2	4	3	2	2	3	2	3	1	2	2	3	2	1	2	1	3	2	3	3	2	2	1	2	3	2	0	2	2	3	3	4	1	2	3	4
418	19	2	4	0	1	0	3	2	1	1	3	0	4	1	3	2	3	2	1	1	2	3	2	1	0	3	2	4	3	2	4	1	0	4	4	3	2	1	0	2	4	3	2	3	4	3	2	3	3
419	19	2	2	0	1	3	3	0	1	1	4	1	3	2	2	2	1	3	2	2	2	3	1	2	0	2	1	1	3	2	2	2	2	2	2	2	2	3	0	2	1	2	3	1	3	3	2	3	3
420	23	2	1	3	3	3	2	1	1	0	3	3	2	3	1	1	1	3	4	2	3	2	3	4	2	2	3	1	3	1	1	3	3	0	1	1	3	2	0	0	0	3	4	1	3	0	4	4	4
421	21	2	2	3	2	2	3	0	2	2	1	0	3	3	0	1	4	3	2	3	1	3	1	1	0	0	1	3	2	2	2	3	1	2	3	4	3	2	0	2	3	4	1	3	2	3	2	4	3
422	20	2	2	2	1	3	1	1	0	2	4	3	3	2	3	0	0	3	1	2	1	1	2	2	2	0	1	2	4	3	2	2	1	2	3	1	2	4	0	0	1	1	3	1	2	2	2	4	3
423	20	1	3	3	3	3	3	1	1	1	2	1	3	2	2	1	2	3	1	3	3	2	1	1	0	1	1	2	1	2	3	2	1	3	2	2	3	2	0	3	3	3	2	3	1	3	2	3	2
424	20	2	0	1	3	2	4	1	1	1	3	3	4	1	2	0	1	3	2	3	2	2	3	1	0	2	2	3	2	3	2	4	1	3	4	4	3	4	0	2	0	4	0	2	3	2	4	4	3
425	21	2	1	2	4	2	3	3	1	0	4	1	3	1	2	2	1	3	4	2	2	3	2	2	0	4	1	0	3	3	4	3	2	3	2	1	2	2	0	1	0	4	1	2	3	4	2	4	1
426	21	2	2	0	2	2	3	3	0	2	1	2	4	0	3	2	1	2	0	2	1	2	1	2	4	2	3	3	1	3	3	4	0	2	4	2	2	2	2	2	4	2	3	1	4	3	1	4	2
427	22	1	1	1	1	2	2	3	1	3	4	3	3	2	2	1	1	3	3	2	1	2	3	3	1	4	1	3	1	1	2	2	3	1	1	2	1	2	1	1	2	2	2	1	4	3	3	3	3
428	20	2	2	1	2	3	3	0	1	2	3	3	3	3	2	1	1	3	3	1	1	2	1	2	0	2	2	3	3	2	2	3	3	1	2	1	1	2	0	1	1	2	3	2	2	3	2	3	3
429	19	2	1	2	1	3	0	1	2	3	4	4	2	2	1	0	0	3	2	0	2	3	0	4	0	1	0	3	1	2	2	2	1	0	2	2	0	3	0	2	1	2	2	1	2	3	4	2	3
430	25	1	3	2	3	2	3	1	2	1	4	2	2	1	3	3	1	2	2	3	3	4	1	4	0	2	2	3	4	2	0	3	2	2	2	2	1	4	0	0	3	3	2	2	2	3	1	4	4
431	18	1	3	3	1	1	1	2	1	1	3	2	2	1	3	1	1	2	2	3	3	1	3	3	1	3	2	3	2	2	1	2	2	3	2	2	3	2	1	1	3	1	1	2	3	3	2	2	3
432	18	1	0	0	2	3	3	1	3	3	2	3	3	3	2	2	3	2	3	1	3	2	2	2	1	1	1	3	3	2	3	3	3	2	3	2	2	3	0	3	1	2	3	1	2	3	3	3	1
433	18	1	2	2	2	2	1	2	1	2	2	2	1	2	1	2	2	2	2	2	2	2	2	2	2	2	2	2	2	2	2	2	2	3	3	2	3	2	3	2	3	2	2	3	2	1	2	2	3
434	22	2	2	2	0	2	3	2	2	2	0	1	3	1	3	0	3	4	3	2	2	2	1	1	3	3	3	3	0	4	4	3	2	2	4	2	2	3	1	4	3	3	2	2	3	4	0	3	2
435	21	1	2	1	1	1	2	2	3	2	1	1	3	1	3	1	1	3	1	2	2	3	2	1	1	2	1	2	1	2	3	2	1	2	2	1	2	2	1	2	2	2	2	2	3	3	1	3	2
436	18	2	3	1	2	2	3	2	2	2	2	3	3	2	2	2	1	1	2	3	4	2	1	2	0	4	2	2	2	2	2	3	1	3	2	4	4	0	0	2	2	3	1	2	3	2	2	3	3
437	22	1	2	1	0	2	4	0	2	1	3	3	3	2	3	3	1	4	4	1	0	3	3	3	0	4	0	2	0	3	1	4	2	3	3	2	2	2	1	0	0	2	3	2	4	0	2	4	3
438	19	2	4	3	3	2	3	3	1	0	1	1	3	1	4	2	1	3	1	1	3	4	3	1	0	2	1	3	2	2	4	3	1	3	3	2	2	4	0	2	1	2	3	3	3	3	1	4	0
439	23	1	1	3	3	2	4	1	4	1	4	1	4	0	1	1	0	4	1	3	4	2	0	3	0	1	3	1	1	4	0	4	1	2	3	3	2	3	2	2	4	4	1	4	2	1	3	4	4
440	22	1	1	1	3	2	2	0	2	2	3	3	2	3	2	0	3	4	3	0	2	1	2	2	0	2	0	1	3	1	2	1	3	2	2	1	1	3	0	1	1	1	4	1	1	2	3	2	1
441	19	2	3	1	3	2	3	4	0	1	3	0	4	0	4	4	0	1	3	3	3	1	4	3	2	3	3	3	4	4	1	3	3	3	3	3	3	2	3	1	3	3	1	3	4	1	3	4	4
442	19	2	1	2	1	2	1	2	2	2	3	3	2	4	1	1	2	3	3	0	2	3	1	3	2	0	1	2	3	3	2	2	3	1	2	1	1	3	0	2	1	2	4	1	3	3	3	2	2
443	22	1	2	2	3	1	3	0	3	2	1	1	4	0	2	1	3	3	3	3	3	1	1	1	0	1	3	0	2	2	3	3	3	1	4	3	3	3	0	2	0	3	3	2	1	1	2	4	2
444	20	2	0	0	2	0	3	0	2	2	0	3	3	3	2	3	2	3	3	3	2	3	3	0	2	3	2	2	2	4	4	2	3	3	4	2	3	2	0	3	1	4	3	2	1	3	1	4	3
445	23	2	1	2	4	4	4	0	3	0	3	3	3	3	1	4	1	3	4	2	3	3	0	2	1	3	1	4	4	4	1	4	4	3	4	2	1	3	1	2	4	4	3	3	1	3	4	4	4
446	23	1	3	3	4	3	3	0	2	1	2	1	3	1	3	4	1	3	3	3	2	2	3	1	0	0	3	1	0	4	4	3	1	3	3	3	4	2	0	3	1	3	2	2	0	2	1	4	0
447	19	2	2	1	2	2	3	0	2	1	2	1	3	1	2	2	3	4	1	2	2	3	2	2	1	1	1	2	0	2	3	2	1	3	2	2	2	4	1	3	3	3	1	3	1	2	2	3	2
448	18	2	2	1	2	3	3	3	2	3	3	3	3	2	2	2	1	0	4	2	3	2	3	3	1	1	3	2	3	4	1	4	3	2	3	2	2	1	1	2	2	2	2	3	4	3	2	4	4
449	18	2	2	2	2	3	3	0	2	2	2	1	3	1	3	4	2	3	1	2	2	3	2	1	0	2	2	3	1	2	3	4	1	3	3	2	3	1	1	2	2	4	1	3	0	4	2	4	1
450	21	1	1	1	1	2	2	0	3	3	2	3	3	2	1	1	3	3	2	2	2	3	2	1	0	1	1	3	1	3	3	2	1	2	3	2	2	3	1	2	1	3	3	2	1	3	3	3	2
451	22	1	1	2	2	2	4	0	3	3	2	1	3	1	3	1	2	3	1	3	3	3	2	1	4	0	1	3	1	3	3	3	1	2	4	2	2	4	4	2	2	3	1	3	3	1	2	3	1
452	18	2	3	1	2	2	4	1	2	3	2	1	2	2	2	2	3	2	1	3	0	3	2	2	0	1	3	2	2	1	4	2	1	2	2	3	2	3	0	3	1	3	3	2	1	2	2	2	3
453	18	1	1	1	3	1	1	0	2	2	1	1	3	4	0	0	2	4	3	2	3	3	3	3	0	2	1	3	1	1	4	3	3	2	2	1	2	3	0	2	1	2	3	2	1	3	2	2	2
454	19	2	2	1	3	2	3	0	3	2	1	2	3	3	1	1	2	3	3	3	2	2	1	2	0	2	3	3	3	2	2	3	3	2	2	3	3	1	2	1	1	2	1	2	1	1	2	3	2
455	18	1	2	2	2	2	3	0	2	2	1	1	3	1	3	2	1	4	1	3	2	4	1	1	0	1	1	2	2	3	4	3	1	2	3	3	3	3	1	3	2	3	1	3	1	3	1	3	1
456	19	1	2	0	1	2	2	0	3	3	1	1	2	3	1	1	2	3	3	2	2	3	2	2	0	1	1	2	1	2	2	2	2	2	2	1	1	2	0	2	1	3	3	1	1	2	2	2	3
457	21	2	2	3	1	3	2	0	2	3	2	3	3	2	2	2	4	4	2	3	3	3	2	2	3	2	1	3	2	3	3	2	2	3	3	2	3	3	1	2	2	3	2	3	1	2	1	3	3
458	21	2	2	1	1	1	2	2	3	3	1	2	2	3	2	1	3	3	1	2	1	4	2	1	0	1	2	1	1	2	4	3	1	2	2	2	2	3	0	3	1	2	2	2	2	3	2	2	2
459	22	1	4	3	1	1	3	3	1	1	3	1	3	1	2	4	1	2	3	3	1	2	2	3	4	3	3	3	2	4	0	4	4	3	3	3	2	2	2	1	2	3	1	2	1	1	4	4	3
460	23	1	2	4	0	2	3	0	2	2	1	1	4	3	1	0	4	4	2	2	4	4	1	0	0	0	0	4	1	2	4	4	2	0	3	2	2	4	0	2	0	3	3	1	1	4	0	4	2
461	26	1	2	2	1	2	2	0	2	2	1	1	3	2	1	1	3	3	2	1	3	3	0	1	0	0	1	2	0	2	3	3	1	1	3	2	2	4	0	2	1	3	3	2	1	3	2	3	1
462	21	1	1	3	1	1	1	0	3	1	3	2	3	2	2	2	3	3	1	2	2	2	2	1	2	3	3	2	2	2	3	3	1	2	2	2	2	3	2	2	2	2	2	2	1	2	3	3	2
463	21	1	1	2	1	1	1	3	2	1	2	3	2	3	2	2	1	3	2	1	2	3	1	2	0	2	1	3	1	2	1	1	3	2	1	1	1	3	0	1	2	2	2	1	3	3	2	3	3
464	21	1	3	1	2	0	3	0	4	2	0	3	3	1	2	2	3	3	0	4	1	3	1	1	0	2	2	3	0	4	4	1	1	3	4	3	3	1	0	4	2	4	1	3	0	4	0	4	1
465	24	2	3	3	3	4	2	4	2	1	4	0	3	1	1	0	1	3	3	1	3	2	1	4	4	2	3	4	1	4	2	4	1	2	4	2	2	3	3	1	3	3	3	1	2	3	2	3	3
466	21	1	2	0	1	1	2	1	3	2	0	1	3	3	1	1	4	3	2	3	1	2	0	0	4	2	3	3	1	2	4	3	2	4	3	3	3	2	2	3	1	2	3	3	0	4	1	3	0
467	21	1	1	0	2	3	1	2	1	1	3	2	2	2	1	1	1	1	1	1	0	3	0	3	3	3	1	1	3	2	2	2	1	1	2	1	1	3	2	1	2	2	2	1	2	2	3	3	3
468	23	1	2	1	3	1	1	2	1	3	0	1	2	1	2	2	1	1	1	1	3	2	2	3	4	1	3	2	3	3	1	3	1	3	3	2	2	2	3	1	1	3	3	1	4	2	3	3	4
469	23	2	3	3	1	2	3	0	2	2	1	1	3	3	1	2	2	3	3	2	3	3	1	1	2	2	1	3	1	2	3	3	3	2	3	2	2	3	1	2	1	2	3	2	1	2	1	3	2
470	20	2	1	1	1	1	2	0	3	2	2	2	2	2	1	1	2	4	1	2	2	3	2	2	0	2	1	2	1	1	3	2	1	1	1	2	2	3	0	2	1	2	3	1	2	3	2	2	2
471	23	2	2	1	1	2	2	0	3	2	2	0	3	0	4	2	4	4	1	3	3	3	1	0	3	1	1	3	2	2	4	3	1	2	3	3	3	3	1	3	1	4	1	2	1	4	1	4	2
472	22	2	2	2	1	2	2	2	2	2	3	3	2	2	1	2	1	3	2	1	3	1	2	2	3	1	1	1	1	1	2	2	2	1	2	1	2	4	2	1	1	3	2	2	2	2	2	3	3
473	23	2	2	1	0	1	2	0	2	3	1	2	3	3	2	0	2	3	2	2	2	3	2	1	3	3	2	4	1	3	3	3	2	2	2	1	1	3	2	2	1	2	2	2	1	3	1	4	2
474	22	2	2	2	4	4	3	3	2	1	3	0	3	0	4	4	0	0	0	3	3	2	4	3	4	2	3	3	3	4	2	4	1	2	4	3	4	3	4	0	3	3	1	3	4	3	3	3	0
475	21	2	2	0	0	2	3	3	1	1	1	2	3	3	1	1	2	2	3	3	1	2	2	2	3	2	4	3	1	3	3	3	3	2	3	2	3	2	1	3	1	3	3	1	1	2	2	2	1
476	19	1	1	1	2	1	1	0	2	3	1	2	2	1	2	1	2	3	0	1	2	2	1	1	0	1	1	3	1	2	3	2	1	2	2	2	1	3	0	3	2	2	2	1	2	3	1	3	2
477	18	2	1	1	0	0	1	2	3	1	1	4	3	2	2	1	3	3	2	1	1	2	2	1	0	2	0	4	1	1	3	4	2	1	3	2	2	3	0	2	1	1	3	1	2	3	2	4	2
478	19	1	2	1	1	1	3	0	2	2	1	0	3	0	4	1	1	3	1	2	0	2	1	0	0	3	1	3	0	3	3	3	1	3	3	1	2	3	1	2	1	3	1	3	3	3	2	4	1
479	18	2	1	3	2	2	0	1	0	3	3	3	1	1	3	3	1	2	0	3	3	2	3	3	0	2	1	3	3	1	1	3	1	3	1	1	2	1	0	1	3	0	0	0	1	4	4	1	4
480	19	1	0	3	3	3	1	2	1	1	3	3	3	3	1	3	1	3	3	2	3	1	3	4	0	0	2	3	3	3	1	3	3	3	3	1	3	3	1	1	1	1	2	1	4	3	3	3	3
481	18	2	2	1	3	3	2	2	2	3	3	0	3	0	2	3	1	3	1	2	2	3	1	2	1	1	2	3	1	2	3	3	1	2	2	2	3	3	1	2	3	3	1	2	1	4	4	4	2
482	18	2	4	1	2	2	4	0	3	2	3	0	3	0	4	4	2	3	0	4	2	4	2	2	0	1	4	3	2	3	4	4	0	3	3	3	3	3	0	3	4	3	1	4	1	2	3	4	1
483	24	2	2	0	1	1	3	0	3	4	2	1	4	3	2	3	2	1	2	3	3	3	0	2	0	2	2	4	1	3	3	4	2	3	2	3	2	0	0	3	2	4	3	2	0	4	3	4	0
484	25	2	3	1	3	4	3	3	4	0	3	0	3	3	3	2	1	3	4	2	4	3	4	3	1	0	2	1	3	4	3	3	3	2	3	1	2	4	0	1	0	3	3	2	3	3	1	4	2
485	24	2	3	3	1	1	2	0	4	4	1	2	4	2	2	0	2	4	2	2	2	4	1	1	0	0	0	3	1	3	4	3	2	1	3	2	3	3	0	2	2	3	2	2	2	4	1	4	2
486	24	2	3	1	3	4	2	0	3	2	3	1	3	2	3	3	0	3	1	3	4	2	1	2	0	4	2	2	2	4	1	3	1	1	4	3	2	2	1	2	2	3	1	3	2	2	2	3	2
487	21	1	4	3	2	1	3	0	1	0	3	0	4	0	3	3	1	1	1	1	3	2	0	3	0	3	3	3	1	3	4	4	1	3	3	4	3	3	0	2	3	4	1	4	3	3	1	4	1
488	20	2	3	2	3	2	3	1	3	2	2	2	3	1	2	1	2	3	1	2	2	3	3	2	0	2	2	2	1	3	4	2	1	3	3	2	3	4	1	2	1	3	3	3	1	3	1	3	2
489	21	2	1	1	0	1	1	0	3	1	0	2	3	4	1	0	3	4	2	1	2	3	0	0	0	0	1	2	1	1	3	2	3	1	1	3	1	4	0	4	3	1	2	3	1	4	3	2	0
490	19	1	3	3	4	1	3	2	1	0	1	2	4	0	3	3	3	3	2	3	3	2	2	1	0	4	4	2	3	3	4	3	1	3	3	3	2	3	0	3	3	3	1	2	2	1	4	3	0
491	18	2	3	2	3	4	3	3	1	1	4	2	3	2	3	3	1	2	2	3	2	3	1	3	3	2	3	2	1	3	2	2	3	3	2	3	2	3	2	1	1	3	3	1	2	2	2	3	3
492	18	2	3	1	1	2	2	2	2	2	2	2	4	3	2	1	2	3	3	1	2	3	1	2	2	1	2	2	1	3	3	2	2	1	3	2	1	4	3	3	2	2	4	2	2	3	2	3	1
493	21	2	1	0	1	2	2	0	3	4	0	4	4	0	3	1	2	4	0	3	3	4	1	0	2	2	2	3	1	3	4	4	0	3	4	4	2	3	0	3	2	3	3	2	2	3	0	4	0
494	20	2	2	0	0	3	3	2	3	3	2	0	3	0	4	1	2	1	1	2	3	4	2	2	0	2	1	4	2	1	4	4	1	2	3	1	2	2	0	4	3	3	2	2	4	4	2	3	0
495	20	1	3	2	2	1	3	0	3	2	1	1	2	3	2	2	3	4	2	1	2	4	0	1	0	1	4	4	1	4	3	2	1	3	3	1	2	3	1	3	2	3	2	2	2	3	1	4	0
496	20	2	1	1	1	3	2	0	4	0	2	3	3	2	2	0	2	4	1	2	1	3	2	2	0	2	1	0	2	1	2	2	1	2	3	1	0	3	0	2	0	2	1	1	2	2	2	3	3
497	21	2	1	1	1	3	3	0	3	3	2	3	4	3	2	2	3	3	2	3	2	3	2	2	3	1	3	3	2	2	3	3	3	3	3	2	2	2	2	1	2	3	3	1	1	3	2	3	2
498	20	2	1	3	2	3	2	0	3	3	3	1	2	1	2	1	2	3	1	1	2	4	0	2	0	3	0	4	2	3	3	1	1	2	3	1	2	3	0	3	3	2	3	1	2	4	2	3	3
499	20	2	1	2	2	3	2	0	3	2	3	3	2	3	1	2	2	3	2	1	2	3	1	2	0	1	1	2	2	2	2	1	2	1	2	1	1	3	0	2	1	2	3	1	2	2	2	3	2
500	22	2	4	1	1	1	3	1	2	1	1	0	3	2	4	3	2	3	1	2	2	3	3	1	3	3	3	1	1	2	3	2	1	3	2	1	1	2	1	2	2	3	3	3	2	2	0	2	1
501	21	2	1	1	3	3	3	1	2	3	2	1	3	1	1	2	3	3	1	3	3	3	2	1	0	0	1	2	1	1	3	3	2	1	1	1	3	1	0	3	2	3	1	2	2	3	1	3	1
502	20	2	1	1	1	3	1	1	1	3	3	3	3	2	1	1	1	2	3	1	1	3	1	3	1	2	1	3	2	3	1	1	2	1	2	1	1	1	1	1	1	2	3	1	1	3	2	3	3
503	20	2	3	1	1	3	2	0	3	1	3	1	3	2	2	1	1	4	2	1	2	3	2	3	0	2	1	3	1	2	2	2	2	1	2	1	1	3	0	2	1	3	3	2	2	3	2	3	1
504	21	2	2	4	2	2	3	0	2	1	1	2	4	0	2	1	3	4	1	3	4	3	1	1	1	0	2	4	1	4	4	4	1	2	4	2	1	4	0	3	2	3	2	1	2	4	2	4	2
505	24	2	0	0	2	3	2	1	0	3	4	3	2	1	0	1	1	2	3	1	2	0	3	3	0	2	1	4	2	3	2	1	2	2	3	1	1	2	1	1	3	1	3	0	3	3	3	2	3
506	22	1	3	2	1	0	3	3	4	4	4	0	4	0	3	1	0	4	0	2	3	4	0	4	0	0	0	4	4	4	0	4	0	2	4	3	3	4	0	1	3	4	0	3	4	4	0	4	2
507	20	2	2	2	1	3	1	0	1	2	4	3	1	4	2	1	3	4	4	1	1	1	1	3	0	1	3	0	1	4	3	1	3	1	3	1	3	3	2	2	1	2	3	2	0	2	1	2	3
508	20	2	2	0	1	3	1	2	0	4	4	3	3	2	2	2	1	1	2	1	2	3	1	2	0	3	1	3	3	1	3	3	2	2	1	1	1	2	0	1	2	2	3	1	4	3	3	3	3
509	24	1	2	2	3	2	2	2	2	2	2	2	3	2	1	1	1	2	3	1	2	4	1	2	3	2	2	2	2	3	2	3	2	3	4	2	1	2	2	2	2	2	4	1	4	3	2	2	1
510	20	2	1	2	1	1	3	2	3	2	0	1	2	3	1	1	3	3	1	1	3	3	2	0	0	2	1	2	1	2	3	2	2	2	1	1	1	3	0	2	0	2	2	1	2	3	2	4	2
511	21	2	1	0	3	2	3	1	3	3	2	1	2	3	2	2	3	2	1	2	2	3	1	1	0	3	1	3	3	2	3	3	2	3	2	3	3	3	0	1	3	2	3	3	2	3	2	3	3
512	23	2	0	0	0	0	2	2	2	3	3	1	3	4	0	0	1	4	3	1	0	4	2	3	0	3	2	4	2	3	4	3	3	4	3	1	1	2	0	3	1	4	4	1	3	4	2	3	0
513	19	2	2	1	2	2	3	1	3	2	2	1	4	1	2	1	1	4	2	3	2	3	1	1	2	2	1	3	2	4	3	3	2	2	3	2	2	4	1	1	3	3	2	1	2	3	1	4	3
514	18	1	2	0	2	1	4	1	3	0	2	3	4	2	1	4	2	3	2	3	1	4	1	1	0	2	3	1	1	4	3	3	2	1	2	3	3	4	1	2	2	3	1	3	1	1	2	4	4
515	19	2	1	0	2	2	3	0	3	2	2	3	3	1	2	4	2	4	1	3	3	3	1	1	2	2	3	3	1	2	3	3	1	2	3	2	3	4	2	2	3	4	2	2	1	4	2	4	2
516	18	1	1	1	0	1	2	1	2	3	1	2	3	2	1	1	4	4	1	2	2	4	2	1	0	2	0	3	1	2	4	3	1	2	2	1	2	3	0	2	1	3	3	1	3	4	2	4	1
517	19	2	1	2	1	2	1	1	2	3	2	2	2	2	1	1	2	3	2	1	2	3	1	2	1	1	1	3	2	2	3	2	2	1	2	1	1	3	1	2	1	2	3	1	2	3	2	3	1
518	22	1	0	1	1	2	1	0	4	1	4	3	3	4	1	1	0	4	4	1	1	3	1	3	0	1	1	4	3	2	1	4	4	1	3	1	1	4	0	1	1	2	4	1	0	3	3	4	3
519	25	2	1	1	2	2	2	0	1	2	4	2	3	2	4	2	0	1	2	2	3	2	4	4	0	4	2	3	3	2	2	4	1	2	3	2	1	0	0	0	4	2	2	1	0	3	4	4	4
520	22	1	1	2	0	3	1	3	0	2	3	1	2	1	2	2	0	3	3	2	2	1	2	3	0	3	2	0	3	2	1	2	3	1	4	0	2	3	0	0	1	1	3	1	3	2	4	4	4
521	18	1	3	1	3	1	2	0	3	0	1	2	4	3	1	1	1	2	2	2	2	3	3	3	0	3	2	1	1	2	4	2	3	2	3	1	2	1	0	0	1	3	3	3	0	1	3	4	1
522	18	2	1	1	3	3	3	1	2	1	4	2	3	4	3	4	1	3	3	2	2	1	3	3	1	1	1	0	2	3	2	3	4	2	3	3	2	3	0	1	1	2	4	1	1	2	3	3	4
523	18	2	4	1	0	3	4	2	1	0	4	3	4	4	4	1	0	3	2	2	0	0	2	4	2	3	4	0	4	4	0	2	3	3	3	1	1	1	0	2	1	3	3	2	3	3	1	3	4
524	18	2	3	4	2	1	4	2	4	4	1	3	3	2	4	4	4	1	2	4	4	3	4	2	0	4	2	1	0	4	4	2	2	3	4	4	4	4	3	3	4	2	3	3	4	3	1	1	2
525	18	2	3	3	3	2	2	1	0	1	3	2	3	3	4	3	0	4	4	3	4	1	3	3	0	3	3	1	3	0	0	4	4	1	3	1	1	1	0	1	1	2	4	3	3	1	1	3	4
526	18	2	1	1	1	0	3	0	4	3	1	4	3	3	0	3	1	3	3	1	4	3	1	2	3	3	3	4	3	3	1	4	2	2	2	1	2	3	0	3	2	3	3	1	0	4	3	3	1
527	18	2	2	2	1	2	1	0	4	3	2	1	3	3	1	1	2	3	4	1	3	3	3	2	0	3	1	3	1	3	2	3	3	2	2	1	1	4	0	2	2	2	2	2	4	3	2	4	0
[truncated: 144 more columns]
